# Supplementary material for: A Rapid Review of Available Evidence to Inform Indicators for Routine Monitoring and Evaluation of Respectful Maternity Care
Source: Glob Health Sci Pract. 2020 Mar 30;8(1):125–35. doi: 10.9745/GHSP-D-19-00323 (PMC7108935; doi:10.9745/GHSP-D-19-00323)
Supplement: 19-00323-Afulani-Supplement1.xlsx [file 19-00323-Afulani-Supplement1.xlsx]

## Sheet: Appendix 1-Indicators+sources
Supplement to: Afulani P, Buback L, McNally B, Mbuyita S, Mwanyika-Sando M, Peca E. Glob Health Sci Pract. 2020;8(1). https://doi.org/10.9745/GHSP-D-19-00323
Supplement 1. Full Set of Indicators Extracted
Domain of Mistreatment or RMC	Indicator	Source of Indicator	Specific Question Asked or Observation Instruction	Type of Indicator (Observed, Self-report, etc.)	How Was the Indicator Used? (e.g., exit survey, facility-based routine data collection)	Where Was the Indicator Used? (Country, Population)	Was the Indicator Validated?	Has the Indicator Been Used in RBF?	RBF Indicator Source	Can the Indicator Be Used for CSC?	CSC Indicator Source	Full Citation of Documents/Papers in Which Indicator Is Referenced (Additional Full References in Word Document)	Notes
Responsiveness	Time to care	Afulani et al: PCMC Validation Paper Sheferaw et al: RMC Validation paper Hitzert et al: Dutch Birth Center Study	Afulani et al: How did you feel about the amount of time you waited? Would you say it was very short, just a little long, somewhat long, or very long? Sheferaw et al: "I was kept waiting a long time before receiving service"; "Service provision was delayed due to the health facilities' internal problem" Hitzert et al: Access for contact in urgent situations; Access for contact without urgency; Wa…	Self-report	Afulani et al: exit interviews and community based interviews with postpartum women (0 to 9 weeks) Sheferaw et al: exit interviews with postpartum women (0 to 7 weeks) Hitzert et al: questionnaire filled out eight to ten weeks postpartum	Afulani et al: Kenya (Migori, Nairobi, and Kiambu Counties), India (Uttar Pradesh), Ghana (East Mamprusi district) Sheferaw et al: 11 urban-based public health facilities in Ethiopia Hitzert et al: 82 midwifery practices in the Netherlands	Yes	Yes	de Walque D, Robyn PJ, Saidou H, Sorgho G, Steenland M. Looking into the Performance-Based Financing Black Box Evidence from an Impact Evaluation in the Health Sector in Cameroon. 2017. The World Bank. Singh J, Shah P. Operational Manual For Community Based Performance Monitoring. 2004. World Bank.	Yes	Singh J, Shah P. Operational Manual For Community Based Performance Monitoring. 2004. World Bank.	Afulani PA, Diamond-Smith N, Golub G, Sudhinaraset M. Development of a tool to measure person-centered maternity care in developing settings: validation in a rural and urban Kenyan population. Reprod Health. 2017;14(1):118. Sheferaw ED, Mengesha TZ, Wase SB. Development of a tool to measure women ’ s perception of respectful maternity care in public health facilities. BMC Pregnancy Childbirth 201…
Dignified care	Introduction of self (provider) to woman	Afulani: PCMC Validation Paper Asefa et al: D&A in Ethiopia Kambala et al: RBF and QoC in Malawi Kambala et al: QoC in Malawi	Afulani et al: "During your time in the health facility did the doctors, nurses, or other health care providers introduce themselves to you when they first came to see you?" Asefa et al: "The provider did not introduce himself/herself to me and my compantion" Kambala et al: 0= Not done; 1= Done Kambala et al: Self introdution by HW: Not Done or Done	Self-report	Afulani et al: exit interviews and community based interviews with postpartum women (0 to 9 weeks) Asefa et al: Facility exit-questionnaire Kambala et al: client exit interviews, in-depth interviews and focus group discussions (FGDs) with women and in-depth interviews with health service providers between 2013 and 2015. Kambala et al: facility exit interviews using questionnaire for women at ante…	Afulani et al: Kenya (Migori, Nairobi, and Kiambu Counties), India (Uttar Pradesh), Ghana (East Mamprusi district) Asefa et al: N=191 Four public health facilities in Addis Ababa, Ethiopia Kambala et al: 28 basic EmOC facilities in Balaka, Dedza, Ntcheu and Mchinji Districts in Malawi Kambala et al: 33 health facilities providing EmOC care in four districts in rural Malawi: Balaka in the southern…	Yes	Yes	Kambala C, Lohmann J, Mazalale J, Brenner S, Sarker M. Perceptions of quality across the maternal care continuum in the context of a health financing intervention : Evidence from a mixed methods study in rural Malawi. BMC Health Serv Res 2017; : 1–19.			Afulani PA, Diamond-Smith N, Golub G, Sudhinaraset M. Development of a tool to measure person-centered maternity care in developing settings: validation in a rural and urban Kenyan population. Reprod Health. 2017;14(1):118. Asefa A, Bekele D. Status of respectful and non-abusive care during facility-based childbirth in a hospital and health centers in Addis Ababa , Ethiopia. Reprod Health 2015; 1…
Dignified care	Greets woman	MCHIP QoC SSA: USAID Maternal and Newborn Quality of Care Survey Rosen et al: Direct observation of RMC in 5 countries Sethi, et al: D&A in Malawi	MCHIP QoC SSA: Respectfully greets the pregnant woman "Yes", "no", "I don't know" Rosen et al: Greets client in a respectful manner. "Yes", "no", "I don't know: Sethi et al: "Did not respectfully greet pregnant woman."	Direct observation	MCHIP QoC SSA: HF study (observation of L&D) Rosen et al: labor and delivery observations Sethi et al: labor and delivery observations	MCHIP SSA: Ethiopia, Kenya, Madagascar, Mozambique, Rwanda, Tanzania, Zanzibar Rosen et al: N=2164 Birth observations in Ethiopia, Kenya, Madagascar, Rwanda and United Rebuplic of Tanzania Sethi et al: N=2019 oberservations at 40 facilities (12 health centers and 28 hospitals) in Malwai						MCHIP. Quality of Antenatal and Delivery Care Services in Six Countries in Sub-Saharan Africa. 2012. Rosen HE, Lynam PF, Carr C, et al. Direct observation of respectful maternity care in five countries: a cross-sectional study of health facilities in East and Southern Africa. BMC Pregnancy Childbirth 2015; 15: 306. Sethi R, Gupta S, Oseni L, Mtimuni A, Rashidi T, Kachale F. The prevalence of disr…
Dignified care	Woman called by name	Afulani: PCMC Validation Paper Sheferaw et al: RMC Validation paper	Afulani et al: Did the doctors, nurses, or other health care providers call you by your name? Sheferaw et al: The health provider called me by name	Self-report	Afulani et al: exit interviews and community based interviews with postpartum women (0 to 9 weeks) Sheferaw et al: exit interviews with postpartum women (0 to 7 weeks)	Afulani et al: Kenya (Migori, Nairobi, and Kiambu Counties), India (Uttar Pradesh), Ghana (East Mamprusi district) Sheferaw et al: 11 urban-based public health facilities in Ethiopia	Yes					Afulani PA, Diamond-Smith N, Golub G, Sudhinaraset M. Development of a tool to measure person-centered maternity care in developing settings: validation in a rural and urban Kenyan population. Reprod Health. 2017;14(1):118. Sheferaw ED, Mengesha TZ, Wase SB. Development of a tool to measure women ’ s perception of respectful maternity care in public health facilities. BMC Pregnancy Childbirth 201…
Dignified care	Treats woman politely and with respect, in a friendly manner	Kruk et al: STAHA Project: Columbia University/AMDD/Ifakara Afulani et al: PCMC Validation Paper MCHIP QoC SSA: USAID Maternal and Newborn Quality of Care Survey Bazant, E.S: Bloomberg School of Public Health of Johns Hopkins University Sheferaw et al: RMC Validation paper Asefa et al: D&A in Ethiopia Rosen et al: Direct observation of RMC in five countries Kambala et al: RBF and QoC in Malawi Sj…	Kruk et al: Responds to questions with promptness, politeness, and truthfulness Afulani et al: "Did the doctors, nurses, and other staff at the facility treat you in a friendly manner?; "Did the doctors, nurses, or other staff at the facility treat you with respect?"; MCHIP QoC SSA: Supports the woman during labor in a friendly way(1st stage of labor) "Yes", "No", "Don't know" Bazant, E.S: Overal…	Kruk et al: Self-report Afulani et al: Self-report MCHIP QoC SSA: Observation Bazant, E.S: Self-report Sheferaw: Self-report Asefa et al: Self-report Rosen et al: Direct observation Kambala et al: Self-report Sjetne et al: Self-report Hennegan et al: Self-report Hitzert et al: Self-report Small et al: Self-report	Kruk et al: Facility exit & follow up questionnaire Afulani et al: exit interviews and community based interviews with postpartum women (0 to 9 weeks) MCHIP QoC SSA: HF study (observation of L&D) Bazant, E.S: Household survey Sheferaw et al: exit interviews with postpartum women (0 to 7 weeks) Asefa et al: Facility exit questionnaire Rosen et al: Labor and delivery observations Kambala et al: cli…	Kruk et al: Tanga Region of Tanzania in Korogwe and Muheza Districts; 8 health facilities (2- district hospitals, 5- gov't. health centers, 1- gov't. dispensary) Women 15+ y.o.. who delivered at facilities were able to participate; N=1179 exit interview and N=1532 for follow-up survey Afulani et al: Kenya (Migori, Nairobi, and Kiambu Counties), India (Uttar Pradesh), Ghana (East Mamprusi district…	Yes	Yes	de Walque D, Robyn PJ, Saidou H, Sorgho G, Steenland M. Looking into the Performance-Based Financing Black Box Evidence from an Impact Evaluation in the Health Sector in Cameroon. 2017. The World Bank. Kambala C, Lohmann J, Mazalale J, Brenner S, Sarker M. Perceptions of quality across the maternal care continuum in the context of a health financing intervention : Evidence from a mixed methods st…	Yes	Cooperative for Assistance and Relief Everywhere. The Community Score Card (CSC): A generic guide for implementing CARE’s CSC process to improve quality of services. 2013. Gullo S, Galavotti C, Kuhlmann AS, Msiska T, Hastings P, Marti CN. Effects of a social accountability approach , CARE ’ s Community Score Card , on reproductive health-related outcomes in Malawi : A cluster-randomized controlle…	Kruk ME, Kujawski S, Mbaruku G, et al Disrespectful and abusive treatment during facility delivery in Tanzania : a facility and community survey. Health Policy Plan 2014; : 1–8. Afulani PA, Diamond-Smith N, Golub G, Sudhinaraset M. Development of a tool to measure person-centered maternity care in developing settings: validation in a rural and urban Kenyan population. Reprod Health. 2017;14(1):11…
Non-dignified care (including verbal abuse)	Culturally inappropriate care	Asefa et al: D&A in Ethiopia	Asefa et al: The providers did not demonstrate caring in a culturally appropriate way.	Self-report	Asefa et al: Facility exit questionnaire	Asefa et al: N=191 Four public health facilities in Addis Ababa						Asefa A, Bekele D. Status of respectful and non-abusive care during facility-based childbirth in a hospital and health centers in Addis Ababa , Ethiopia. Reprod Health 2015; 12: 1–9.
Non-dignified care (including verbal abuse)	Verbal Abuse (insults, intimidation, shouting, scolding, threatening)	MCHIP Kruk et al: STAHA Project: Columbia University/AMDD/Ifakara Abuya et al: Population Council, Kenya Brown et al: Promoting Childbirth Companions in South Africa Silal et al: Inequalities in access and use of MHS in South Africa Okafor et al: Disrespect and Abuse in LIC: Nigeria Afulani et al: PCMC Validation Paper Raj et al: Mistreatment in UP India Sheferaw et al: Validation of RMC tool Ase…	MCHIP Question Kruk et al: Health providers shouting or scoulding patient; Health providers threatening to withhold treatment because patient could not pay or did not have supplies; Health providers threatening patient for any reason or making negative or disparaging comments about the patient: Reponses to indicators were: "Experienced" or "Not Experienced" Abuya et al: "At any point during your …	Self-report Sando et al: Self-report and observations Sethi et al: Direct observations Peca et al: Self-report Vogel et al: Self-report de Souza et al: Self-report	MCHIP 2012: Survey questionnaire with stakeholders Kruk et al: Facility exit & follow up questionnaire Abuya et al: Facility exit interview and other data sources Brown et al: Facility exit interview Silal et al: Facility exit interviews (qual/quant) Okafor et al: Facility exit questionnaire Afulani et al: exit interviews and community based interviews with postpartum women (0 to 9 weeks) Raj et …	MCHIP: 48 individuals from 19 countries (40% Africa, 33% Latin America, 27% Asia, Europe, and Oceania) Areas of work: 37% training/teaching, 27% clinical practice, 25% technical advising/consulting, 23% program/management, and 19% research: IEC/promotion and advocacy Kruk et al: Tanga Region of Tanzania in Korogwe and Muheza Districts; 8 health facilities (2- district hospitals, 5- gov't. health …	Yes			Yes	Gullo S, Galavotti C, Kuhlmann AS, Msiska T, Hastings P, Marti CN. Effects of a social accountability approach , CARE ’ s Community Score Card , on reproductive health-related outcomes in Malawi : A cluster-randomized controlled evaluation. PLoS One 2017; 12: 1–20.	Kruk ME, Kujawski S, Mbaruku G et al Disrespectful and abusive treatment during facility delivery in Tanzania : a facility and community survey. Health Policy Plan 2014; : 1–8. & Kujawski SA, Freedman LP, Ramsey K, Mbaruku G, Mbuyita S, et al. (2017) Community and health system intervention to reduce disrespect and abuse during childbirth in Tanga Region, Tanzania: A comparative before-and-after …
Autonomy	Involvement in care	Afulani: PCMC Validation Paper MCHIP Vogel et al: Validation of tools in 4 countries Hitzert et al: Dutch Birth Center Study Small et al: Immigrant View on QoC	Afulani et al: Did you feel like the doctors, nurses or other staff at the facility involved you in decisions about your care? MCHIP Questions Vogel et al: Women treated as passive participants during child birth Hitzert et al: Involving client in decision-making; Acceptance of treatment refusal; Involving client in decision-making on pain relief; Involving client in decision-mkaing on setting of…	Self-report	Afulani et al: exit interviews and community based interviews with postpartum women (0 to 9 weeks) MCHIP 2012: Survey questionnaire with stakeholders Vogel et al: In-depth interviews and focus group discussions among women, healthcare providers and administrators Hitzert et al: questionnaire filled out eight to ten weeks postpartum Small et al: Interviews with women 6 months after childbirth in M…	Afulani et al: Kenya (Migori, Nairobi, and Kiambu Counties), India (Uttar Pradesh), Ghana (East Mamprusi district) MCHIP 2012: 48 individuals from 19 countries (40% Africa, 33% Latin America, 27% Asia, Europe, and Oceania) Areas of work: 37% training/teaching, 27% clinical practice, 25% technical advising/consulting, 23% program/management, and 19% research: IEC/promotion and advocacy Vogel et al…	Yes			Yes	Gullo S, Galavotti C, Kuhlmann AS, Msiska T, Hastings P, Marti CN. Effects of a social accountability approach , CARE ’ s Community Score Card , on reproductive health-related outcomes in Malawi : A cluster-randomized controlled evaluation. PLoS One 2017; 12: 1–20.	Afulani PA, Diamond-Smith N, Golub G, Sudhinaraset M. Development of a tool to measure person-centered maternity care in developing settings: validation in a rural and urban Kenyan population. Reprod Health. 2017;14(1):118. Reis V, Deller B, Carr C, Smith J. Respectful Maternity Care: Country Experiences. 2012. USAID/MCHIP. Vogel JP, Bohren MA, Tunçalp Ö, et al. How women are treated during facil…
Autonomy	Woman allowed to have choice of companion during labor and delivery	Afulani: PCMC Validation Paper Hill et al: URC/HCI/USAID MCHIP Mozambique: USAID Evaluation MCHIP QoC SSA: USAID Maternal and Newborn Quality of Care Survey Rosen et al: Direct observation of RMC in five countries MCHIP Brown et al: Promoting Childbirth Companions in South Africa Okafor et al: Disrespect and Abuse in LIC: Nigeria Sethi et al: D&A in Malawi Peca et al: Perceptions and use of insti…	Afulani et al: "Were you allowed to have someone you wanted (outside of staff at the facility, such as family or friends) to stay with you during labor?" ;"Were you allowed to have someone you wanted to stay with you during delivery?" Hill et al: Don't have access to questionnaire MCHIP Mozambique: "Do patient request for a delivery companion? Does having a companion during delivery pose any chal…	Afulani et al: Self-report Hill et al: Self-report MCHIP Mozambique: Self-report MCHIP QoC SSA: Observation Rosen et al: Observation MCHIP: Self-report Brown et al: Self-report Okafar et al: Self-report Sethi et al: Observations Peca et al: Self-report Kambala et al: Self-report Kambala et al: Self-report Sjetne et al: Self-report Vogel et al: Self-report Colombara et al: Self-report Diniz et al:…	Afulani et al: exit interviews and community based interviews with postpartum women (0 to 9 weeks) Hill et al: Chart review using a structured quantitative questionnaire (Cannot find questionnaire) MCHIP Mozambique: Provider interviews MCHIP SSA: HF study (observation of L&D) & provider interviews Rosen et al: labor and delivery observation MCHIP 2012: Survey questionnaire with stakeholders Brown…	Afulani et al: Kenya (Migori, Nairobi, and Kiambu Counties), India (Uttar Pradesh), Ghana (East Mamprusi district) Hill et. Al: Albania, Armenia, Georgia, and Russia MCHIP Mozambique: 17 health facilities in Maputo (city and province, 13 health facilities in Manica, and 18 health facilities from Nampula provinces in Mozambique MCHIP SSA: Ethiopia, Kenya, Madagascar, Mozambique, Rwanda, Tanzania, …	Yes	Yes	Kambala C, Lohmann J, Mazalale J, Brenner S, Sarker M. Perceptions of quality across the maternal care continuum in the context of a health financing intervention : Evidence from a mixed methods study in rural Malawi. BMC Health Serv Res 2017; : 1–19.			Afulani PA, Diamond-Smith N, Golub G, Sudhinaraset M. Development of a tool to measure person-centered maternity care in developing settings: validation in a rural and urban Kenyan population. Reprod Health. 2017;14(1):118. Hill K, Chitashvili T, Trevitt J, Panajyan G. Assessment of Selected Best Practices for Maternal and Newborn Care in Albania, Armenia, Georgia, and Russia. 2012. USAID. Veltha…	`
Autonomy	Allowing food and drink during labor	MCHIP QoC SSA: USAID Maternal and Newborn Quality of Care Survey MCHIP Toolkit: USAID/MCHIP Rosen et al: Direct observation of RMC in five countries MCHIP Brown et al: Promoting Childbirth Companions in South Africa Asefa et al: D&A in Ethiopia Afulani et al: PCMC Validation Paper Sethi et al: D&A in Malawi Vogel et al: Validation of tools in 4 countries Colombara et al: Inst. Delivery satisfacti…	MCHIP QoC SSA: "Encourages woman to consume fluids/food throughout labor, at least once (1st stage): "Yes", "No", "Don't know" MCHIP Toolkit 2012: Rank the intensity (0-4) "Provision of drink and food during normal labor" Rosen et al: "Provider encourages or client to consume food and fluids during labor." "yes,", "no", "I don't know" MCHIP Question Brown et al: don't have access to the interview…	MCHIP QoC SSA: Observation MCHIP Toolkit: Self-report Rosen et al: Direct observation MCHIP: Self-report Brown et al: Self-report Asefa et al: Self-report Afulani et al: Self-report Sethi et al: Observation Vogel et al: Self-report Colombara et al: Self-report	MCHIP SSA: HF study (observation of L&D) & provider interviews MCHIP 2012: Survey questionnaire with stakeholders Rosen et al: Labor and delivery observations MCHIP 2012: Survey questionnaire with stakeholders Brown et al: Facility exit interview Asefa et al: Facility exit questionnaire Afulani et al: exit interviews and community based interviews with postpartum women (0 to 9 weeks) Sethi et al:…	MCHIP SSA: Ethiopia, Kenya, Madagascar, Mozambique, Rwanda, Tanzania, and Zanzibar MCHIP Toolkit 2012: 48 individuals from 19 countries (40% Africa, 33% Latin America, 27% Asia, Europe, and Oceania) Areas of work: 37% training/teaching, 27% clinical practice, 25% technical advising/consulting, 23% program/management, and 19% research: IEC/promotion and advocacy Rosen et al: N=2164 Birth observati…	Yes					MCHIP. Quality of Antenatal and Delivery Care Services in Six Countries in Sub-Saharan Africa. 2012. Reis V, Deller B, Carr C, Smith J. Respectful Maternity Care: Country Experiences. 2012. USAID/MCHIP. Rosen HE, Lynam PF, Carr C, et al. Direct observation of respectful maternity care in five countries: a cross-sectional study of health facilities in East and Southern Africa. BMC Pregnancy Childb…
Autonomy	Woman allowed to move around during labor	MCHIP QoC SSA: USAID Maternal and Newborn Quality of Care Survey MCHIP Toolkit 2012:USAID/MCHIP Asefa et al: D&A in Ethiopia Rosen et al: Direct observation of RMC in five countries MCHIP Brown et al: Promoting Childbirth Companions in South Africa Sethi et al: D& A in Malawi Vogel et al: Validation of tools in 4 countries Hennegan et al: QoC Queensland	MCHIP SSA : At least once, encourages/assists woman to ambulate and assume different positions during labor?: "Yes", "No", "Don't know" MCHIP Toolkit 2012: What examples of respectful care aspects have been promoted in your country (or in the countries where you work)? Please place “X” in the appropriate boxes to specify the intensity with which the action has been taken: 4 for greater intensity …	MCHIP SSA: Observation MCHIP Toolkit 2012: Self-report Asefa et al: Self-report Rosen et al: Direct observation MCHIP: Self-report Brown et al: Self-report Sethi et al: Observations Vogel et al: Self-report Hennegan et al: Self-report	MCHIP SSA: HF study (observations of L&D) Survey Instruments: direct observations ANC & L&D; audits of supplies and equipment; provider knowledge tests; reviews of records and national policies MCHIP 2012: Survey questionnaire with stakeholders Asefa et al: Facility exit questionnaire Rosen et al: Labor and delivery observations MCHIP 2012: Survey questionnaire with stakeholders Brown et al: Faci…	MCHIP SSA: Ethiopia, Kenya, Madagascar, Mozambique, Rwanda, Tanzania, and Zanzibar MCHIP Toolkit 2012: 48 individuals from 19 countries (40% Africa, 33% Latin America, 27% Asia, Europe, and Oceania) Areas of work: 37% training/teaching, 27% clinical practice, 25% technical advising/consulting, 23% program/management, and 19% research: IEC/promotion and advocacy Asefa et al: N=191 Four public heal…				Yes	Gullo S, Galavotti C, Kuhlmann AS, Msiska T, Hastings P, Marti CN. Effects of a social accountability approach , CARE ’ s Community Score Card , on reproductive health-related outcomes in Malawi : A cluster-randomized controlled evaluation. PLoS One 2017; 12: 1–20.	MCHIP. Quality of Antenatal and Delivery Care Services in Six Countries in Sub-Saharan Africa. 2012. Reis V, Deller B, Carr C, Smith J. Respectful Maternity Care: Country Experiences. 2012. USAID/MCHIP. MCHIP 2013* Asefa A, Bekele D. Status of respectful and non-abusive care during facility-based childbirth in a hospital and health centers in Addis Ababa , Ethiopia. Reprod Health 2015; 12: 1–9. R…
Autonomy	Woman allowed to assume position of choice during birth	Afulani: PCMC Validation Paper Hill et al: URC/HCI/USAID MCHIP Toolkit 2012: USAID/MCHIP MCHIP Mozambique: USAID Evaluation MCHIP QoC SSA: USAID Maternal and Newborn Quality of Care Survey Asefa et al: D&A in Ethiopia MCHIP Vogel et al: Validation of tools in 4 countries Colombara et al: Inst. Delivery satisfaction Guatemala Faneite et al: Obstetric Violence Venzuela	Afulani et al: During the delivery, do you feel like you were able to be in the position of your choice? Hill et al: Don't have access to questionnaire MCHIP Toolkit 2012: Rank the intensity (0-4) "Choice of position for delivery" MCHIP Mozambique: "Do patients request to give birth in certain positions? What do you do if a woman does ask about alternative birthing positions?"; "Do you inform pat…	Afulani et al: Self-report Hill et al: Self-report MCHIP Toolkit 2012: Self-report MCHIP Mozambique: Self-report and observation MCHIP QoC SSA: observation Asefa et al: Self-report MCHIP: Self-report Sethi et al: Observations Vogel et/al: Self-report	Afulani et al: exit interviews and community based interviews with postpartum women (0 to 9 weeks) Hill et al: Chart review using a structured quantitative questionnaire (Cannot find questionnaire) MCHIP 2012: Survey questionnaire with stakeholders MCHIP Mozambique: Provider interviews ad birth observations MCHIP SSA: HF study (observation of L&D) & provider interviews Asefa et al: Facility exit …	Afulani et al: Kenya (Migori, Nairobi, and Kiambu Counties), India (Uttar Pradesh), Ghana (East Mamprusi district) Hill et. Al: Albania, Armenia, Georgia, and Russia MCHIP Toolkit 2012: 48 individuals from 19 countries (40% Africa, 33% Latin America, 27% Asia, Europe, and Oceania) Areas of work: 37% training/teaching, 27% clinical practice, 25% technical advising/consulting, 23% program/managemen…	Yes			Yes	Gullo S, Galavotti C, Kuhlmann AS, Msiska T, Hastings P, Marti CN. Effects of a social accountability approach , CARE ’ s Community Score Card , on reproductive health-related outcomes in Malawi : A cluster-randomized controlled evaluation. PLoS One 2017; 12: 1–20.	Afulani PA, Diamond-Smith N, Golub G, Sudhinaraset M. Development of a tool to measure person-centered maternity care in developing settings: validation in a rural and urban Kenyan population. Reprod Health. 2017;14(1):118. Hill K, Chitashvili T, Trevitt J, Panajyan G. Assessment of Selected Best Practices for Maternal and Newborn Care in Albania, Armenia, Georgia, and Russia. 2012. USAID. Reis V…
Autonomy	Woman gives informed consent for all procedures and examinations (e.g. C/S, hysterectomy, tubal ligation, episiotomy, VE, blood transfusion, augmentation of labor, shaving of pubic hair)	Hill et al: URC/HCI/USAID Bazant, E.S: Bloomberg School of Public Health of Johns Hopkins University Asefa et al: D&A in Ethiopia MCHIP Kruk et al: STAHA Project: Columbia University/AMDD/Ifakara Abuya et al: Population Council, Kenya Okafor et al: Disrespect and Abuse in LIC: Nigeria Afulani et al: PCMC Validation Paper Raj et al: Mistreatment in UP India Sando et al: D&A in Tanzania Kambala et …	Hill et al: Routine consent for procedures Bazant, E.S: "The providers asked for your agreement before doing clinical procedures." Asefa et al: The provider did not obtain my consent or permission prior to any procedures. MCHIP Question Kruk et al: Tubal ligation (tying of fallopian tubes) without her permission; Hysterectomy (getting your uterus removed) without patient or relatives' persmission…	Self-report Sando et al: Self-report and observations	Hill et al: Chart review using a structured quantitative questionnaire (Cannot find questionnaire) Bazant, E.S: Household Survey Asefa et al: Facility exit questionnaire MCHIP 2012: Survey questionnaire with stakeholders Kruk et al: Facility exit & follow up questionnaire Abuya et al: Facility exit interview and other data sources Okafar et al: Facility exit questionnaire Afulani et al: exit inte…	Hill et. Al: Albania, Armenia, Georgia, and Russia Bazant, E.S: N=1,266 in two informal settlements in Nairobi, Kenya Asefa et al: N=191 Four public health facilities in Addis Ababa, Ethiopia MCHIP: 48 individuals from 19 countries (40% Africa, 33% Latin America, 27% Asia, Europe, and Oceania) Areas of work: 37% training/teaching, 27% clinical practice, 25% technical advising/consulting, 23% prog…						Hill K, Chitashvili T, Trevitt J, Panajyan G. Assessment of Selected Best Practices for Maternal and Newborn Care in Albania, Armenia, Georgia, and Russia. 2012. USAID. Bazant ES. Women’s Place of Delivery and Experience of Quality in Delivery of Care: A Quantitative and Qualitative Study in Nairobi’s Informal Settlements. 2008. Asefa A, Bekele D. Status of respectful and non-abusive care during …
Loss of Autonomy	Woman detained at facilities due to lack of payment	MCHIP Abuya et al: Population Council, Kenya Okafar et al: Disrespect and Abuse in LIC: Nigeria Asefa et al: D&A in Ethiopia Sando et al: D&A in Tanzania Afulani et al: PCMC Validation Paper Vogel et al: Validation of tools in 4 countries Kruk et al: STAHA Project: Columbia University/AMDD/Ifakara	MCHIP Question Abuya et al: At any point during your stay for this delivery were you or your baby prevented from leaving this facility because you could not pay? Okafar et al: You were detained or kept in the health facility more than necessary because: (a) you could not pay up your hospital bills at discharge (b) you could not pay up baby's hospital bills after your baby's discharge (c) none of …	Self-report Sando et al: Self-report and observations	MCHIP 2012: Survey questionnaire with stakeholders Abuya et al: Facility exit interview and other data sources Okafar et al: Facility exit questionnaire Asefa et al: Facility exit questionnaire Sando et al: Postpartum interviews, community follow up (4-6 weeks post-delivery), and direct observation. Afulani et al: exit interviews and community based interviews with postpartum women (0 to 9 weeks)…	MCHIP: 48 individuals from 19 countries (40% Africa, 33% Latin America, 27% Asia, Europe, and Oceania) Areas of work: 37% training/teaching, 27% clinical practice, 25% technical advising/consulting, 23% program/management, and 19% research: IEC/promotion and advocacy Abuya et al: 13 facilities in Kisumu, Nyandarua, Uasin Gishu sub counties and 1 maternity hospital in Nairobi, Kenya. Inclusion cri…						Reis V, Deller B, Carr C, Smith J. Respectful Maternity Care: Country Experiences. 2012. USAID/MCHIP. Abuya T, Warren CE, Miller N, et al. Exploring the Prevalence of Disrespect and Abuse during Childbirth in Kenya. PLoS One 2015; 10: 1–13. Okafor II, Ugwu EO, Obi SN. International Journal of Gynecology and Obstetrics Disrespect and abuse during facility-based childbirth in a low-income country. …
Supportive Care	Responds to womans call for help	Afulani: PCMC Validation Paper Sheferaw et al: RMC Validation paper Asefa et al: D&A in Ethiopia Kambala et al: RBF and QoC in Malawi	Afulani et al: When you needed help, did you feel the doctors, nurses or other staff at the facility paid attention?; "Did you feel the doctors and nurses paid attention to you during your stay in the facility?*"(not validated) Sheferaw et al: The health worker responded to my needs whether or not I asked Asefa et al: "The provider encouraged me to call if needed"; "The provider did not come quic…	Self-report	Afulani et al: exit interviews and community based interviews with postpartum women (0 to 9 weeks) Sheferaw et al: exit interviews with postpartum women (0 to 7 weeks) Asefa et al: Facility exit questionnaite Kambala et al: client exit interviews, in-depth interviews and focus group discussions (FGDs) with women and in-depth interviews with health service providers between 2013 and 2015.	Afulani et al: Kenya (Migori, Nairobi, and Kiambu Counties), India (Uttar Pradesh), Ghana (East Mamprusi district) Sheferaw et al: 11 urban-based public health facilities in Ethiopia Asefa et al: N=191 Four public health facilities in Addis Ababa, Ethiopia Kambala et al: 28 basic EmOC facilities in Balaka, Dedza, Ntcheu and Mchinji Districts in Malawi	Yes	Yes	Kambala C, Lohmann J, Mazalale J, Brenner S, Sarker M. Perceptions of quality across the maternal care continuum in the context of a health financing intervention : Evidence from a mixed methods study in rural Malawi. BMC Health Serv Res 2017; : 1–19.			Afulani PA, Diamond-Smith N, Golub G, Sudhinaraset M. Development of a tool to measure person-centered maternity care in developing settings: validation in a rural and urban Kenyan population. Reprod Health. 2017;14(1):118. MCHIP 2013* Sheferaw ED, Mengesha TZ, Wase SB. Development of a tool to measure women ’ s perception of respectful maternity care in public health facilities. BMC Pregnancy Ch…	*Cannot find the source of the Performance Standards and Verification Criteria for MCHIP 2013
Lack of Supportive Care	Abandonment or denial of care: Leaving the woman alone or unattended to during labor or delivery (e.g. ignore woman when in need or calling for help, delivered alone/without assistance neglect post-delivery)	MCHIP Kruk et al: STAHA Project: Columbia University/AMDD/Ifakara Abuya et al: Population Council, Kenya Okafar et al: Disrespect and Abuse in LIC: Nigeria Bazant, E.S: Bloomberg School of Public Health of Johns Hopkins University Asefa et al: D&A in Ethiopia Sando et al: D&A in Tanzania Peca et al: Perceptions and use of institutional facilities for births in Guatemala Kambala et al: RBF and QoC…	MCHIP Question Kruk et al: " Health providers ignore/abandon patient when in need or when she called for help."; "Delivered alone/without assistance" Abuya et al: At any point during your stay for this delivery were you left unattended by health providers when you needed care? Okafar et al: Abandonment/neglect received during childbirth: (a) left alone unattended to in second stage of labor (b) d…	Self-report	MCHIP 2012: Survey questionnaire with stakeholders Kruk et al: Facility exit & follow up questionnaire Abuya et al: Facility exit interview and other data sources Okafar et al: Facility exit questionnaire Bazant, E.S: Household Survey Asefa et al: Facility exit questionnaire Sando et al: Postpartum interviews, community follow up (4-6 weeks post-delivery), and direct observation. Peca et al: Faci…	MCHIP: 48 individuals from 19 countries (40% Africa, 33% Latin America, 27% Asia, Europe, and Oceania) Areas of work: 37% training/teaching, 27% clinical practice, 25% technical advising/consulting, 23% program/management, and 19% research: IEC/promotion and advocacy Kruk et al: Tanga Region of Tanzania in Korogwe and Muheza Districts; 8 health facilities (2- district hospitals, 5- gov't. health …		Yes	Kambala C, Lohmann J, Mazalale J, Brenner S, Sarker M. Perceptions of quality across the maternal care continuum in the context of a health financing intervention : Evidence from a mixed methods study in rural Malawi. BMC Health Serv Res 2017; : 1–19.	Yes	Gullo S, Galavotti C, Kuhlmann AS, Msiska T, Hastings P, Marti CN. Effects of a social accountability approach , CARE ’ s Community Score Card , on reproductive health-related outcomes in Malawi : A cluster-randomized controlled evaluation. PLoS One 2017; 12: 1–20.	Reis V, Deller B, Carr C, Smith J. Respectful Maternity Care: Country Experiences. 2012. USAID/MCHIP. Kruk ME, Kujawski S, Mbaruku G et al Disrespectful and abusive treatment during facility delivery in Tanzania : a facility and community survey. Health Policy Plan 2014; : 1–8. & Kujawski SA, Freedman LP, Ramsey K, Mbaruku G, Mbuyita S, et al. (2017) Community and health system intervention to re…
Supportive Care	Providers show interest in woman's well-being and ask about emotional feelings and concerns	Afulani: PCMC Validation Paper Bazant, E.S: Bloomberg School of Public Health of Johns Hopkins University Sheferaw et al: RMC Validation paper Afulani et al: PCMC Validation Paper Sethi et al: D&A in Malawi Vogel et al: Validation of tools in 4 countries Hennegan et al: QoC Queensland Sjetne et al: QoC Norway Mukamurigo et al: Rwanda Perceptions/Experiences	Afulani et al: "Did the doctors and nurses at the facility talk to you about how you were feeling?"; "Did the doctors, nurses or other staff at the facility support your anxieties and fears?"; Did the doctors, nurses and other staff at the facility show they care for you?*" (not validated) Bazant, E.S: The providers showed a genuine interest in your well-being (asking woman after delivery); Overa…	Self-report Sethi et al: Observation	Afulani et al: exit interviews and community based interviews with postpartum women (0 to 9 weeks) Bazant, E.S: Household survey Sheferaw et al: exit interviews with postpartum women (0 to 7 weeks) Sethi et al: labor and delivery observations Vogel et al: In-depth interviews and focus group discussions among women, healthcare providers and administrators Hennegan et al: state-wide population base…	Afulani et al: Kenya (Migori, Nairobi, and Kiambu Counties), India (Uttar Pradesh), Ghana (East Mamprusi district) Bazant, E.S: N=1,266 in two informal settlements in Nairobi, Kenya Sheferaw et al: 11 urban-based public health facilities in Ethiopia Sethi et al: N=2019 oberservations at 40 facilities (12 health centers and 28 hospitals) in Malawi Vogel et al: Two health facilities in each country…	Yes			Yes	Cooperative for Assistance and Relief Everywhere. The Community Score Card (CSC): A generic guide for implementing CARE’s CSC process to improve quality of services. 2013. Gullo S, Galavotti C, Kuhlmann AS, Msiska T, Hastings P, Marti CN. Effects of a social accountability approach , CARE ’ s Community Score Card , on reproductive health-related outcomes in Malawi : A cluster-randomized controlle…	Afulani PA, Diamond-Smith N, Golub G, Sudhinaraset M. Development of a tool to measure person-centered maternity care in developing settings: validation in a rural and urban Kenyan population. Reprod Health. 2017;14(1):118. Bazant ES. Women’s Place of Delivery and Experience of Quality in Delivery of Care: A Quantitative and Qualitative Study in Nairobi’s Informal Settlements. 2008. Sheferaw ED, …
Supportive Care	Control pain	Afulani et al: PCMC Validation Paper Kruk et al: STAHA Project: Columbia University/AMDD/Ifakara MCHIP Toolkit: USAID/MCHIP Sheferaw et al: RMC Validation paper Asefa et al: D&A in Ethiopia Sethi et al: D&A in Malawi Kambala et al: RBF and QoC in Malawi Mukamurigo et al: Rwanda Perceptions/Experiences Small et al: Immigrant View on QoC	Afulani et al: "Did the doctors and nurses ask how much pain you were in?*;"(not validated) "Do you feel the doctors or nurses did everything they could to help control your pain?" Kruk et al: ""How would you rate the availability of drugs, supplies, and medical equipment at this facility for this delivery?" MCHIP Toolkit 2012: Rank the intensity (0-4) "Provision of drug free comfort and pain rel…	Self-report Sethi et al: Observation	Afulani et al: exit interviews and community based interviews with postpartum women (0 to 9 weeks) Kruk et al: Facility exit & follow up questionnaire MCHIP 2012: Survey questionnaire with stakeholders Sheferaw et al: exit interviews with postpartum women (0 to 7 weeks) Asefa et al: Facility exit questionnaire Sethi et al: Labor and delivery observations Kambala et al: client exit interviews, in-…	Afulani et al: Kenya (Migori, Nairobi, and Kiambu Counties), India (Uttar Pradesh), Ghana (East Mamprusi district) Kruk et al: Tanga Region of Tanzania in Korogwe and Muheza Districts; 8 health facilities (2- district hospitals, 5- gov't. health centers, 1- gov't. dispensary) Women 15+ y.o.. who delivered at facilities were able to participate; N=1179 exit interview and N=1532 for follow-up surve…	Yes	Yes	Kambala C, Lohmann J, Mazalale J, Brenner S, Sarker M. Perceptions of quality across the maternal care continuum in the context of a health financing intervention : Evidence from a mixed methods study in rural Malawi. BMC Health Serv Res 2017; : 1–19.	Yes	Gullo S, Galavotti C, Kuhlmann AS, Msiska T, Hastings P, Marti CN. Effects of a social accountability approach , CARE ’ s Community Score Card , on reproductive health-related outcomes in Malawi : A cluster-randomized controlled evaluation. PLoS One 2017; 12: 1–20.	Afulani PA, Diamond-Smith N, Golub G, Sudhinaraset M. Development of a tool to measure person-centered maternity care in developing settings: validation in a rural and urban Kenyan population. Reprod Health. 2017;14(1):118. Kruk ME, Kujawski S, Mbaruku G et al Disrespectful and abusive treatment during facility delivery in Tanzania : a facility and community survey. Health Policy Plan 2014; : 1–8…	Public Health Foundation of India: Availability of drugs for complications and pain management from source: Community Survey with women, following Qualitative Research (This was noted in the RMC Indicator Compendium Measurement Workshop Report but cannot find a reference)
Communication	Encouraged to and able to ask questions	Afulani: PCMC Validation Paper MCHIP Mozambique: USAID Evaluation MCHIP QoC SSA: USAID Maternal and Newborn Quality of Care Survey Abuya et al: Population Council, Kenya Bazant, E.S: Bloomberg School of Public Health of Johns Hopkins University Asefa et al: D&A in Ethiopia Rosen et al: Direct observation of RMC in five countries Sethi et al: D&A in Malawi Kambala et al: RBF and QoC in Malawi Kamb…	Afulani et al: Did you feel you could ask the doctors, nurses or other staff at the facility answered any questions you had? MCHIP Mozambique: "Responding to user concerns": "Yes" "No" MCHIP QoC SSA: Ask woman if she has questions (and support person if present) (Assessment of Pregnant Woman at Facility) "Yes", "No", "Don't know" Abuya et al: Are clients encouraged to ask questions Bazant, E.S.: …	Afulani et al: Self-report MCHIP Mozambique: Observations MCHIP QoC SSA: Observation Abuya et al: Self-report Bazant, E.S: Self-report Asefa et al: Self-report Rosen et al: Observations Sethi et al: Observations Kambala et al: Self-report Kambala et al: Self-report Sjetne et al: Self-report Vedam et al: Self-report Hitzert et al: Self-report	Afulani et al: exit interviews and community based interviews with postpartum women (0 to 9 weeks) MCHIP Mozambique: Provider observations MCHIP QoC SSA: HF study (observation of L&D) Abuya et al: Facility exit interviews Bazant, E.S: Household survey Asefa et al: Facility exit questionnaire Rosen et al: Labor and delivery observation Sethi et al: Labor and delivery observations Kambala et al: cl…	Afulani et al: Kenya (Migori, Nairobi, and Kiambu Counties), India (Uttar Pradesh), Ghana (East Mamprusi district) MCHIP Mozambique: 17 health facilities in Maputo (city and province, 13 health facilities in Manica, and 18 health facilities from Nampula provinces in Mozambique MCHIP SSA: Ethiopia, Kenya, Madagascar, Mozambique, Rwanda, Tanzania, and Zanzibar Abuya et al: 13 facilities in Kisumu, …	Yes	Yes	Kambala C, Lohmann J, Mazalale J, Brenner S, Sarker M. Perceptions of quality across the maternal care continuum in the context of a health financing intervention : Evidence from a mixed methods study in rural Malawi. BMC Health Serv Res 2017; : 1–19.	Yes	Cooperative for Assistance and Relief Everywhere. The Community Score Card (CSC): A generic guide for implementing CARE’s CSC process to improve quality of services. 2013.	Afulani PA, Diamond-Smith N, Golub G, Sudhinaraset M. Development of a tool to measure person-centered maternity care in developing settings: validation in a rural and urban Kenyan population. Reprod Health. 2017;14(1):118. Velthausz D, Donco R, Maraxis BV. Maternal Child Health Integrated Program Mozambique ( 2011-2015 ) End-Term Evaluation. 2015. USAID/MCHIP. MCHIP. Quality of Antenatal and Del…
Communication	Providers speaks to a woman in a language and at a language-level that she understands	Afulani: PCMC Validation Paper Bazant, E.S: Bloomberg School of Public Health of Johns Hopkins University Sheferaw et al: Validation of RMC tool Asefa et al: D&A in Ethiopia Peca et al: Perceptions and use of institutional facilities for births in Guatemala Kambala et al: RBF and QoC in Malawi Vogel et al: Validation of tools in 4 countries Colombara et al: Inst. Delivery satisfaction Guatemala H…	Afulani et al: Did the doctors, nurses or other staff at the facility speak to you in a language you could understand? Bazant, E.S: The providers explained your health status with terms that were understandable (asking woman after delivery) Sheferaw et al: The health workers spoke to me in a language that I could understand." Asef et al: "The provider spoke to me in a language and at a language-l…	Self-report	Afulani et al: exit interviews and community based interviews with postpartum women (0 to 9 weeks) Bazant, E.S: Household survey Sheferaw et al: exit interviews with postpartum women (0 to 7 weeks) Asefa et al: Facility exit questionnaire Peca et al: Facility exit interviews Kambala et al: client exit interviews, in-depth interviews and focus group discussions (FGDs) with women and in-depth inter…	Afulani et al: Kenya (Migori, Nairobi, and Kiambu Counties), India (Uttar Pradesh), Ghana (East Mamprusi district) Bazant, E.S: N=1,266 in two informal settlements in Nairobi, Kenya Sheferaw et al: 11 urban-based public health facilities in Ethiopia Asefa et al: N=191 Four public health facilities in Addis Ababa, Ethiopia Peca et al: Guatemala facility and home births in the Western Highlands Kam…	Yes	Yes	Kambala C, Lohmann J, Mazalale J, Brenner S, Sarker M. Perceptions of quality across the maternal care continuum in the context of a health financing intervention : Evidence from a mixed methods study in rural Malawi. BMC Health Serv Res 2017; : 1–19.	Yes	Gullo S, Galavotti C, Kuhlmann AS, Msiska T, Hastings P, Marti CN. Effects of a social accountability approach , CARE ’ s Community Score Card , on reproductive health-related outcomes in Malawi : A cluster-randomized controlled evaluation. PLoS One 2017; 12: 1–20.	Afulani PA, Diamond-Smith N, Golub G, Sudhinaraset M. Development of a tool to measure person-centered maternity care in developing settings: validation in a rural and urban Kenyan population. Reprod Health. 2017;14(1):118. Bazant ES. Women’s Place of Delivery and Experience of Quality in Delivery of Care: A Quantitative and Qualitative Study in Nairobi’s Informal Settlements. 2008. Sheferaw ED, …
Communication	Explain to woman what to expect and any medications administered or procedures performed	MCHIP QoC SSA: USAID Maternal and Newborn Quality of Care Survey Afulani: PCMC Validation Paper Hill et al: URC/HCI/USAID Kruk et al: STAHA Project: Columbia University/AMDD/Ifakara Abuya et al: Population Council, Kenya Asefa et al: D&A in Ethiopia Rosen et al: Direct observation of RMC in five countries Sethi et al: D&A in Malawi Kambala et al: RBF and QoC in Malawi Kambala et al: QoC in Malawi…	MCHIP QoC SSA: Explains procedures to woman (support person if present or the situation allows) before proceeding ; "Informs the woman what will happen before conducting VE" ; "Informs woman of findings" "Yes", "No", "Don't know" Afulani et al: "Did the doctors and nurses explain to you why they were doing examinations or procedures on you?"; "Did the doctors and nurses explain to you why they we…	MCHIP QoC SSA: Observation Afulani et al:;: Self-report Hill et al: Self-report Kruk et al: Self-report Abuya et al: Self-report Asefa et al: Self-report Rosen et al: Observation Sethi et.a: Observation Kamabla et al: Self-report Kambala et al: Self-report Mukamurigo et al: SElf-report Leal et al: Self-report Small et al: Self-report Hulton et al: Self-report	MCHIP QoC SSA: HF study (observation of L&D) Afulani et al: exit interviews and community based interviews with postpartum women (0 to 9 weeks) Hill et al: Chart review using a structured quantitative questionnaire (Cannot find questionnaire) Kruk et al: Facility exit & follow up questionnaire Abuya et al: Facility exit interviews Asefa et al: Facility exit questionnaite Rosen et al: labor and de…	MCHIP SSA: Ethiopia, Kenya, Madagascar, Mozambique, Rwanda, Tanzania, and Zanzibar Afulani et al: Kenya (Migori, Nairobi, and Kiambu Counties), India (Uttar Pradesh), Ghana (East Mamprusi district) Hill et. Al: Albania, Armenia, Georgia, and Russia Kruk et al: Tanga Region of Tanzania in Korogwe and Muheza Districts; 8 health facilities (2- district hospitals, 5- gov't. health centers, 1- gov't. …	Yes	Yes	Kambala C, Lohmann J, Mazalale J, Brenner S, Sarker M. Perceptions of quality across the maternal care continuum in the context of a health financing intervention : Evidence from a mixed methods study in rural Malawi. BMC Health Serv Res 2017; : 1–19.	Yes	Gullo S, Galavotti C, Kuhlmann AS, Msiska T, Hastings P, Marti CN. Effects of a social accountability approach , CARE ’ s Community Score Card , on reproductive health-related outcomes in Malawi : A cluster-randomized controlled evaluation. PLoS One 2017; 12: 1–20.	MCHIP. Quality of Antenatal and Delivery Care Services in Six Countries in Sub-Saharan Africa. 2012. Afulani PA, Diamond-Smith N, Golub G, Sudhinaraset M. Development of a tool to measure person-centered maternity care in developing settings: validation in a rural and urban Kenyan population. Reprod Health. 2017;14(1):118. Hill K, Chitashvili T, Trevitt J, Panajyan G. Assessment of Selected Best …
Communication	Lack of information	Sando et al: D&A in Tanzania Raj et al: Mistreatment in UP India Sethi et al: D&A in Malawi Josephson et al: QI in MNCH across 32 RBF programs Gergen et al: QoC in RBF in 32 programs in 28 countries Sjetne et al: QoC in Norway	Sando et al: Reported lack of information: No informaiton given on ward environment (e.g. where the bathrooms are); No information given on meal times and what to eat or not eat; Findings of general examination not explained, Findings of vaginal examination not explained; No information given on progress of labor; No information given on when to breastfeed baby" Raj et al: Did the health care pro…	Sando et al: Self-report and observations Raj et al: Self-report Sethi et al: Direct observatiosn Josephson: Quality Indicator Gergen et al: Quality indicator Sjetne et al: Self-report	Sando et al: Postpartum interviews, community follow up (4-6 weeks post-delivery), and direct observation. Raj et al: Post partum interview/survey post-discharge Sethi et al: labor and delivery observations Josephson: Facility assessment Gergen et al: Facility assessment Sjetne et al: Interviews and questionnaire 17 weeks post delivery	Sando et al: Large urban referral hospital in Sar es Salaam, Tanzania Raj et al: All districts in Uttar Pradesh; married women N=2639 Sethi et al: N=2019 oberservations at 40 facilities (12 health centers and 28 hospitals) in Malawi Josephson et al: Review of 68 checklists (at primary, secondary, and tertiary levels) used in 32 RBF programmes across 28 counties Gergen et al:: Systematic Review of…		Yes	Gergen J, Josephson E, Coe M, Ski S, Madhavan S. Quality of Care in Performance-Based Financing : How It Is Incorporated in 32 Programs Across 28 Countries. Glob Heal Sci Pract 2017; : 90–107. Josephson E, Gergen J, Coe M, Ski S, Madhavan S, Bauhoff S. How do performance-based financing programmes measure quality of care ? A descriptive analysis of 68 quality checklists from 28 low- and middle-in…	Yes	Gullo S, Galavotti C, Kuhlmann AS, Msiska T, Hastings P, Marti CN. Effects of a social accountability approach , CARE ’ s Community Score Card , on reproductive health-related outcomes in Malawi : A cluster-randomized controlled evaluation. PLoS One 2017; 12: 1–20.	Sando D, Ratcliffe H, Mcdonald K, et al. The prevalence of disrespect and abuse during facility-based childbirth in urban Tanzania. BMC Pregnancy Childbirth 2016; : 1–10. Raj A, Dey A, Boyce S et al Associations Between Mistreatment by a Provider during Childbirth and Maternal Health Complications in Uttar Pradesh, India. Matern Child Health J 2017; 21: 1821–33. Sethi R, Gupta S, Oseni L, Mtimuni…
Physical Abuse	Slapping, hitting, pushing, pinching or otherwise beating or restraining the patient	MCHIP Kruk et al: STAHA Project: Columbia University/AMDD/Ifakara Abuya et al: Population Council, Kenya Brown et al: Promoting Chilbirth Companions in South Africa Okafor et al: Disrespect and Abuse in LIC: Nigeria Afulani et al: PCMC Validation Paper Raj et al: Mistreatment in UP India Sheferaw et al: Validation of RMC tool Sando et al: D&R in Tanzania Sethi et al: D&A in Malawi Vogel et al: Va…	MCHIP Toolkit: In the country (or countries) where you work has mistreatment to women in labor ward or other maternity care areas been identified? If so, select the more frequent examples in the following list: No examples been identified, Verbal abuse (insult), Physical abuse (slapping/hitting), Abandonment of care (leaving the woman alone or unattended), Lack of information about the care provi…	Self-report Sando et al: Self-report and observations Sethi et al: Direct observations	MCHIP 2012: Survey questionnaire with stakeholders Kruk et al: Facility exit & follow up questionnaire Abuya et al: Facility exit interview and other data sources Brown et al: Facility exit interview Okafar et al: Facility exit questionnaire Afulani et al: exit interviews and community based interviews with postpartum women (0 to 9 weeks) Raj et al: Post partum interview/sruvey post-discharge She…	MCHIP: 48 individuals from 19 countries (40% Africa, 33% Latin America, 27% Asia, Europe, and Oceania) Areas of work: 37% training/teaching, 27% clinical practice, 25% technical advising/consulting, 23% program/management, and 19% research: IEC/promotion and advocacy Kruk et al: Tanga Region of Tanzania in Korogwe and Muheza Districts; 8 health facilities (2- district hospitals, 5- gov't. health …	Yes					Reis V, Deller B, Carr C, Smith J. Respectful Maternity Care: Country Experiences. 2012. USAID/MCHIP. Kruk ME, Kujawski S, Mbaruku G et al Disrespectful and abusive treatment during facility delivery in Tanzania : a facility and community survey. Health Policy Plan 2014; : 1–8. & Kujawski SA, Freedman LP, Ramsey K, Mbaruku G, Mbuyita S, et al. (2017) Community and health system intervention to re…
Physical Abuse	Episiotomy given or sutured without anesthesia	Okafor et al: Disrespect and Abuse in LIC: Nigeria Brown et al: Promoting Childbirth Companions in South Africa Leal et al: Racial Inequities in Care Brazil	Okafor et al: Please tick everything that happened to you during your last child birth; Physical abuses during childbirth: (a) beaten, slapped, or pinched (b) tied down or restrained during labor (c) episiotomy given or sutured without anesthesia (d) sexually abused by health work during labor (e) none of the above Brown et al: don't have access to the interview guide Leal et al: Local anesthesia…	Self-report	Okafar et al: Facility exit questionnaire Brown et al: Facility exit interview Leal et al: National hospital-based study suing medical records and interviews	Okafar et al: Enugu State University Teaching Hospital Parklane (ESUTH-Parklane) in SE Nigeria; Consecutive postnatal mothers who accessed services for their newborn immunizations at ESUTH-Parklane and received prenatal care and delivery services at ESUTH Parklane. N=446 Brown et al: Two urban and two rural health districts in South Africa; N=1,231 quantitative exit interviews and N=16 qualitativ…						Okafor II, Ugwu EO, Obi SN. International Journal of Gynecology and Obstetrics Disrespect and abuse during facility-based childbirth in a low-income country. Int J Gynecol Obstet 2014; : 8–11. Brown H, Hofmeyr GJ, Nikodem VC et al Promoting childbirth companions in South Africa : a randomised pilot study. BMC Med 2007; 5: 1–9. Leal M do C, Noquiera da Gama SG, Periera APE, do Carmo CN, Santos RV.…
Physical Abuse	Rape or being forced to have intercourse or perform any other sexual act against your will by someone who isn't your husband	Kruk et al: STAHA Project: Columbia University/AMDD/Ifakara Abuya et al: Population Council, Kenya Okafor et al: Disrespect and Abuse in LIC: Nigeria Asefa et al: D&A in Ethiopia Vogel et al: Validation of tools in 4 countries	Kruk et al: Health providers sexually harassing patients or mkaing sexual advances (for example, inappropriate touching or sexual comments that make you feel uncomfortable); Rape. By Rape I mean being forced to have intercourse or perform any other seual acts against your will by someone other than your husband: Reponses to indicators were: "Experienced" or "Not Experienced" Abuya et al: At any p…	Self-report	Kruk et al: Facility exit and follow up questionnaire Abuya et al: Facility exit interview and other data sources Okafor et al: Facility exit questionnaire Asefa et al: Facility exit questionnaire Vogel et al: In-depth interviews and focus group discussions among women, healthcare providers and administrators	Kruk et al: Tanga Region of Tanzania in Korogwe and Muheza Districts; 8 health facilities (2- district hospitals, 5- gov't. health centers, 1- gov't. dispensary) Women 15+ y.o. who delivered at facilities were able to participate; N=1179 exit interview and N=1532 for follow-up survey Abuya et al: 13 facilities in Kisumu, Nyandarua, Uasin Gishu sub counties and 1 maternity hospital in Nairobi, Ken…	Yes					Kruk ME, Kujawski S, Mbaruku G et al Disrespectful and abusive treatment during facility delivery in Tanzania : a facility and community survey. Health Policy Plan 2014; : 1–8. & Kujawski SA, Freedman LP, Ramsey K, Mbaruku G, Mbuyita S, et al. (2017) Community and health system intervention to reduce disrespect and abuse during childbirth in Tanga Region, Tanzania: A comparative before-and-after …
Privacy	During all stages of labor there was physical privacy (e.g. examined behind screens or curtains and other physical visual barriers)	Afulani: PCMC Validation Paper Abuya et al: Population Council, Kenya MCHIP QoC SSA: USAID Maternal and Newborn Quality of Care Survey MCHIP Mozambique: USAID Evaluation Bazant, E.S: Bloomberg School of Public Health of Johns Hopkins University Asefa et al: D&A in Ethiopia Rosen et al: Direct observation of RMC in five countries MCHIP Kruk et al: STAHA Project: Columbia University/AMDD/Ifakara Si…	Afulani et al "During examinations in the labor room, were you covered up with a cloth or blanket or screened with a curtain so that you did not feel exposed?" Abuya et al: "At any point during your stay for this delivery were you treated in a way that violated your privacy? At any point during your stay for this delivery were you treated in a way that violated your confidentiality?" MCHIP QoC SS…	Afulani et al: Self-report Abuya et al: Self-report MCHIP QoC SSA: Observation MCHIP Mozambique: Observation Bazant, E.S Self-report Asefa et al: Self-report Rosen et al: Direct observation MCHIP: Self-report Kruk et al: Self-report Silal et al: Self-report Sando et al: Self-report and observations Sethi et al: Observations Gergen et al: Quality indicator Kambala et al: Self-report Vogel et al: S…	Afulani et al: exit interviews and community based interviews with postpartum women (0 to 9 weeks) Abuya et al: Facility exit interviews MCHIP SSA: HF study (observation of L&D) MCHIP Mozambique: Provider observations Bazant, E.S: Household Survey Asefa et al: Facility exit questionnaire Rosen et al: Labor and delivery observations MCHIP 2012: Survey questionnaire with stakeholders Kruk et al: Fa…	Afulani et al: Uttar Pradesh, India and Kenya Abuya et al: 13 facilities in Kisumu, Nyandarua, Uasin Gishu sub counties and 1 maternity hospital in Nairobi, Kenya. Inclusion criteria: 15-45y.o. who received maternity services from one of the facilities. N=641 MCHIP SSA: Ethiopia, Kenya, Madagascar, Mozambique, Rwanda, Tanzania, Zanzibar MCHIP Mozambique: 17 health facilities in Maputo (city and p…	Yes	Yes	de Walque D, Robyn PJ, Saidou H, Sorgho G, Steenland M. Looking into the Performance-Based Financing Black Box Evidence from an Impact Evaluation in the Health Sector in Cameroon. 2017. The World Bank. Kambala C, Lohmann J, Mazalale J, Brenner S, Sarker M. Perceptions of quality across the maternal care continuum in the context of a health financing intervention : Evidence from a mixed methods st…	Yes	Cooperative for Assistance and Relief Everywhere. The Community Score Card (CSC): A generic guide for implementing CARE’s CSC process to improve quality of services. 2013. Labrecque G, Batonon I. Accountability in Local Service Delivery The Tuungane Community Scorecard Approach Policy. 2015. International Rescue Committee.	Afulani PA, Diamond-Smith N, Golub G, Sudhinaraset M. Development of a tool to measure person-centered maternity care in developing settings: validation in a rural and urban Kenyan population. Reprod Health. 2017;14(1):118. Abuya T, Warren CE, Miller N, et al. Exploring the Prevalence of Disrespect and Abuse during Childbirth in Kenya. PLoS One 2015; 10: 1–13. MCHIP. Quality of Antenatal and Deli…
Confidentiality	Patient records and medical files are kept confidential with limited access (including verbal)	Afulani: PCMC Validation Paper Abuya et al: Population Council, Kenya MCHIP Toolkit: USAID/MCHIP Kambala et al: RBF and QoC in Malawi Kambala et al: QoC in Malawi Vogel et al: Validation of tools in 4 countries	Afulani et al: "Do you feel like your health information was or will be kept confidential at this facility?" Abuya et al: "At any point during your stay for this delivery were you treated in a way that violated your privacy? At any point during your stay for this delivery were you treated in a way that violated your confidentiality?" "Staff do not discuss or disclose client information to non-hea…	Self-report	Afulani et al: exit interviews and community based interviews with postpartum women (0 to 9 weeks) Abuya et al: Facility exit interviews MCHIP 2012: Survey questionnaire with stakeholders Kambala et al: client exit interviews, in-depth interviews and focus group discussions (FGDs) with women and in-depth interviews with health service providers between 2013 and 2015. Kambala et al: facility exit …	Afulani et al: Kenya (Migori, Nairobi, and Kiambu Counties), India (Uttar Pradesh), Ghana (East Mamprusi district) Abuya et al: 13 facilities in Kisumu, Nyandarua, Uasin Gishu sub counties and 1 maternity hospital in Nairobi, Kenya. Inclusion criteria: 15-45y.o. who received maternity services from one of the facilities. N=641 MCHIP Toolkit 2012: 48 individuals from 19 countries (40% Africa, 33% …	Yes	Yes	Kambala C, Lohmann J, Mazalale J, Brenner S, Sarker M. Perceptions of quality across the maternal care continuum in the context of a health financing intervention : Evidence from a mixed methods study in rural Malawi. BMC Health Serv Res 2017; : 1–19.	Yes	Labrecque G, Batonon I. Accountability in Local Service Delivery The Tuungane Community Scorecard Approach Policy. 2015. International Rescue Committee.	Afulani PA, Diamond-Smith N, Golub G, Sudhinaraset M. Development of a tool to measure person-centered maternity care in developing settings: validation in a rural and urban Kenyan population. Reprod Health. 2017;14(1):118. Abuya T, Warren CE, Miller N, et al. Exploring the Prevalence of Disrespect and Abuse during Childbirth in Kenya. PLoS One 2015; 10: 1–13. Reis V, Deller B, Carr C, Smith J. R…
Confidentiality	Disclosure of private patient health information without patient permission	MCHIP Kruk et al: STAHA Project: Columbia University/AMDD/Ifakara Abuya et al: Population Council, Kenya Okafor et al: Disrespect and Abuse in LIC: Nigeria Sando et al: D&A in Tanzania Afulani et al: PCMC Validation Paper Kambala et al: RBF and QoC in Malawi Kambala et al: QoC in Malawi Vogel et al: Validation of tools in 4 countries Hitzert et al: Dutch Birth Center Study	MCHIP Question Kruk et al: "Health providers discussed patient's private health information in a way that others could here: "Experienced" , "Witnessed", "Heard about", "None" Abuya et al: At any point during your stay for this delivery were you treated in a way that violated your privacy? At any point during your stay for this delivery were you treated in a way that violated your confidentiality…	Self-report Sando et al: Self-report and observations	MCHIP 2012: Survey questionnaire with stakeholders Kruk et al: Facility exit & follow up questionnaire Abuya et al: Facility exit interview and other data sources Okafar et al: Facility exit questionnaire Sando et al: Postpartum interviews, community follow up (4-6 weeks post-delivery), and direct observation. Afulani et al: exit interviews and community based interviews with postpartum women (0 …	MCHIP: 48 individuals from 19 countries (40% Africa, 33% Latin America, 27% Asia, Europe, and Oceania) Areas of work: 37% training/teaching, 27% clinical practice, 25% technical advising/consulting, 23% program/management, and 19% research: IEC/promotion and advocacy Kruk et al: Tanga Region of Tanzania in Korogwe and Muheza Districts; 8 health facilities (2- district hospitals, 5- gov't. health …		Yes	Kambala C, Lohmann J, Mazalale J, Brenner S, Sarker M. Perceptions of quality across the maternal care continuum in the context of a health financing intervention : Evidence from a mixed methods study in rural Malawi. BMC Health Serv Res 2017; : 1–19.	Yes	Labrecque G, Batonon I. Accountability in Local Service Delivery The Tuungane Community Scorecard Approach Policy. 2015. International Rescue Committee.	Reis V, Deller B, Carr C, Smith J. Respectful Maternity Care: Country Experiences. 2012. USAID/MCHIP. Kruk ME, Kujawski S, Mbaruku G et al Disrespectful and abusive treatment during facility delivery in Tanzania : a facility and community survey. Health Policy Plan 2014; : 1–8. & Kujawski SA, Freedman LP, Ramsey K, Mbaruku G, Mbuyita S, et al. (2017) Community and health system intervention to re…
Stigma and discrimination	Discrimination or poor treatment based on ethnicity, race, economic status, HIV status, birth outcomes, age, number of children etc.	MCHIP Okafar et al: Disrespect and Abuse in LIC: Nigeria Silal et al: Inequalities in access and use of MHS in South Africa Raj et al: Mistreatment in UP India Sheferaw et al: Validation of RMC tool Sando: Harvard D&A and HIV in Tanzania MHTF Asefa et al: D&A in Ethiopia Afulani et al: PCMC Validation Paper Vogel et al: Validation of tools in 4 countries Vedam et al: The Mothers on Respect (MOR) …	MCHIP Question Okafar et al: You received discriminatory services in labor based on (a) ethnicity (b) teenage (< 19) (c.) single motherhood status (D) HIV sero-positive status (e) low socio-economic status (f) none of the above Silal et al: don't have access to the quant exit interview guide or qual interview guide Raj et al: "Did any health care provider exhibit discriminatory behavior towards y…	Self-report Direct Observation	MCHIP 2012: Survey questionnaire with stakeholders Okafar et al: Facility exit questionnaire Silal et al: Facility exit interviews (qual/quant) Raj et al: Post partum interview/survey post-discharge Sheferaw et al: exit interviews with postpartum women (0 to 7 weeks) Sando et al: Facility exit interviews N=2000, direct observation during childbirth N=208, structured questionnaire with providers N…	MCHIP: 48 individuals from 19 countries (40% Africa, 33% Latin America, 27% Asia, Europe, and Oceania) Areas of work: 37% training/teaching, 27% clinical practice, 25% technical advising/consulting, 23% program/management, and 19% research: IEC/promotion and advocacy Okafar et al: Enugu State University Teaching Hospital Parklane (ESUTH-Parklane) in SE Nigeria; Consecutive postnatal mothers who a…	Yes					Reis V, Deller B, Carr C, Smith J. Respectful Maternity Care: Country Experiences. 2012. USAID/MCHIP. Okafor II, Ugwu EO, Obi SN. International Journal of Gynecology and Obstetrics Disrespect and abuse during facility-based childbirth in a low-income country. Int J Gynecol Obstet 2014; : 8–11. Silal SP, Penn-kekana L, Harris B et alExploring inequalities in access to and use of maternal health se…
Trust	Trust staff	Afulani: PCMC Validation Paper Kambala et al: RBF and QoC in Malawi Sjetnee t.al: QoC in Norway Hitzert et al: Dutch Birth Center Study	Afulani et al: "Did you feel you could completely trust the doctors, nurses or other staff at the facility with regards to your care?"; "Did you feel the doctors, nurses or other staff at the facility took the best care of you?" Kambala et al: Quality of care dimensions measured on a scale of 1–10 (1 = complete disagreement; 10 = complete agreement); I felt confident in the health worker's abilit…	Self-report	Afulani et al: exit interviews and community based interviews with postpartum women (0 to 9 weeks) Kambala et al: client exit interviews, in-depth interviews and focus group discussions (FGDs) with women and in-depth interviews with health service providers between 2013 and 2015. Sjetne et al: Interviews and questionnaire 17 weeks post delivery Hitzert et al: questionnaire filled out eight to ten…	Afulani et al: Kenya (Migori, Nairobi, and Kiambu Counties), India (Uttar Pradesh), Ghana (East Mamprusi district) Kambala et al: 28 basic EmOC facilities in Balaka, Dedza, Ntcheu and Mchinji Districts in Malawi Sjetne et al: Women who gave birth in last quarter of 20111 in a Norwegian institution Hitzert et al: 82 midwifery practices in the Netherlands	Yes	Yes	Kambala C, Lohmann J, Mazalale J, Brenner S, Sarker M. Perceptions of quality across the maternal care continuum in the context of a health financing intervention : Evidence from a mixed methods study in rural Malawi. BMC Health Serv Res 2017; : 1–19.	Yes	Gullo S, Galavotti C, Kuhlmann AS, Msiska T, Hastings P, Marti CN. Effects of a social accountability approach , CARE ’ s Community Score Card , on reproductive health-related outcomes in Malawi : A cluster-randomized controlled evaluation. PLoS One 2017; 12: 1–20.	Afulani PA, Diamond-Smith N, Golub G, Sudhinaraset M. Development of a tool to measure person-centered maternity care in developing settings: validation in a rural and urban Kenyan population. Reprod Health. 2017;14(1):118. Kambala C, Lohmann J, Mazalale J, Brenner S, Sarker M. Perceptions of quality across the maternal care continuum in the context of a health financing intervention : Evidence f…
Facility Environment	Cleanliness (clean place of delivery and someone cleans the place of delivery afterwards)	Afulani: PCMC Validation Paper Abuya et al: Population Council, Kenya Josephson et al: QI in MNCH across 32 RBF programs Gergen et al: QoC in RBF in 32 programs in 28 countries Kambala et al: RBF and QoC in Malawi	Afulani et al: Thinking about the wards, washrooms and the general environment of the health facility, will you say the facility was very clean, clean, dirty, or very dirty? Abuya et al: Unhygienic conditions; No change of linens; Woman asked to clean delivery couches; Dirty bathrooms/toilet Josephson et. al: Delivery room is in good condition (e.g. walls are made of solid material, are not crack…	Afulani et al: Self-report Abuya et al: Self-report and direct observations Josephson et al: Quality indicator Gergen et al: Quality indicator Kambala et al: Self-report	Afulani et al: exit interviews and community based interviews with postpartum women (0 to 9 weeks) Abuya et al: Facility exit interview and other data sources Josephson: Facility assessment Gergen et al: Facility assessment Kambala et al: client exit interviews, in-depth interviews and focus group discussions (FGDs) with women and in-depth interviews with health service providers between 2013 and…	Afulani et al: Kenya (Migori, Nairobi, and Kiambu Counties), India (Uttar Pradesh), Ghana (East Mamprusi district) Abuya et al: 13 facilities in Kisumu, Nyandarua, Uasin Gishu sub counties and 1 maternity hospital in Nairobi, Kenya. Inclusion criteria: 15-45y.o. who received maternity services from one of the facilities. N=641 Josephson et al: Review of 68 checklists (at primary, secondary, and t…	Yes	Yes	de Walque D, Robyn PJ, Saidou H, Sorgho G, Steenland M. Looking into the Performance-Based Financing Black Box Evidence from an Impact Evaluation in the Health Sector in Cameroon. 2017. The World Bank. Gergen J, Josephson E, Coe M, Ski S, Madhavan S. Quality of Care in Performance-Based Financing : How It Is Incorporated in 32 Programs Across 28 Countries. Glob Heal Sci Pract 2017; : 90–107. Jose…	Yes	Cooperative for Assistance and Relief Everywhere. The Community Score Card (CSC): A generic guide for implementing CARE’s CSC process to improve quality of services. 2013. Singh J, Shah P. Operational Manual For Community Based Performance Monitoring. 2004. World Bank. Gullo S, Galavotti C, Kuhlmann AS, Msiska T, Hastings P, Marti CN. Effects of a social accountability approach , CARE ’ s Communi…	Afulani PA, Diamond-Smith N, Golub G, Sudhinaraset M. Development of a tool to measure person-centered maternity care in developing settings: validation in a rural and urban Kenyan population. Reprod Health. 2017;14(1):118. Public Health Foundation of India Abuya et al Exploring the Prevalence of Disrespect and Abuse during Childbirth in Kenya Josephson E, Gergen J, Coe M, Ski S, Madhavan S, Bauh…	Public Health Foundation of India: Clean place of delivery and someone cleans up afterwards from source: Community Survey with women, following Qualitative Research (This was noted in the RMC Indicator Compendium Measurement Workshop Report but cannot find a reference)
Facility Environment	Availability of adequate number of qualified medical personnel	Afulani: PCMC Validation Paper Josephson et al: QI in MNCH across 32 RBF programs Gergen et al: QoC in RBF in 32 programs in 28 countries Vogel et al: Validation of tools in 4 countries Hennegan et al: QoC Queensland	Afulani et al: Do you think there was enough health staff in the facility to care for you? Josephson et al: ANC performed by qualified personnel; All deliveries are carried out by qualified personnel Gergen et al: All deliveries are carried out by qualified personnel Vogel et al: Staffing constraints Hennegan et al: Had at least one carer through labor/birth: (Y/N)	Afulani et al: Self-report Josephson et al: Quality Indicators Gergen et al: Quality indicators Vogel et al: Self-report Hennegan et al: Self-report	Afulani et al: exit interviews and community based interviews with postpartum women (0 to 9 weeks) Josephson et al: Facility assessment Gergen et al: Facility assessment Vogel et al: In-depth interviews and focus group discussions among women, healthcare providers and administrators Hennegan et al: state-wide population based survey	Afulani et al: Kenya (Migori, Nairobi, and Kiambu Counties), India (Uttar Pradesh), Ghana (East Mamprusi district) Josephson et al: Review of 68 checklists (at primary, secondary, and tertiary levels) used in 32 RBF programmes across 28 counties Gergen et al:: Systematic Review of RBF manuals and tools to measure quality performance in 28 LMICs for all facility levels primary, secondary, and tert…	Yes	Yes	Engineer CY, Dale E, Agarwal A, et al. Effectiveness of a pay-for-performance intervention to improve maternal and child health services in Afghanistan : a cluster-randomized trial. Int J Epidemiol 2016. DOI:10.1093/ije/dyv36 de Walque D, Robyn PJ, Saidou H, Sorgho G, Steenland M. Looking into the Performance-Based Financing Black Box Evidence from an Impact Evaluation in the Health Sector in Cam…	Yes	Cooperative for Assistance and Relief Everywhere. The Community Score Card (CSC): A generic guide for implementing CARE’s CSC process to improve quality of services. 2013. Misra V, Ramasankar P, Durga L, Murty JVR, Agarwal S, Shah P. Social Accountability Series: South Asia Sustainable Development Department. 2007. Labrecque G, Batonon I. Accountability in Local Service Delivery The Tuungane Comm…	Afulani PA, Diamond-Smith N, Golub G, Sudhinaraset M. Development of a tool to measure person-centered maternity care in developing settings: validation in a rural and urban Kenyan population. Reprod Health. 2017;14(1):118. Josephson E, Gergen J, Coe M, Ski S, Madhavan S, Bauhoff S. How do performance-based financing programmes measure quality of care ? A descriptive analysis of 68 quality checkl…	Public Health Foundation of India: Availability of qualified medical personnel from source: Community Survey with women, following Qualitative Research (This was noted in the RMC Indicator Compendium Measurement Workshop Report but cannot find a reference)
Facility Environment	Overcrowding	Afulani: PCMC Validation Paper Sethi et al: D&A in Malawi	Afulani et al: Thinking about the labor and postnatal wards, did you feel the health facility was crowded? Sethi et al: Woman did not have her own bed	Afulani et al: Self-report Sethi et al: Observations	Afulani et al: exit interviews and community based interviews with postpartum women (0 to 9 weeks) Sethi et al: Labor and delivery observations	Afulani et al: Kenya (Migori, Nairobi, and Kiambu Counties), India (Uttar Pradesh), Ghana (East Mamprusi district) Sethi et al: N=2019 oberservations at 40 facilities (12 health centers and 28 hospitals) in Malawi	Yes	Yes	Brenner S, Brenner S, Wilhelm D, et al. Implementation research to improve quality of maternal and newborn health care , Malawi. World Heal Organ 2017; : 1–22. Singh J, Shah P. Operational Manual For Community Based Performance Monitoring. 2004. World Bank.	Yes	Singh J, Shah P. Operational Manual For Community Based Performance Monitoring. 2004. World Bank. Misra V, Ramasankar P, Durga L, Murty JVR, Agarwal S, Shah P. Social Accountability Series: South Asia Sustainable Development Department. 2007.	Afulani PA, Diamond-Smith N, Golub G, Sudhinaraset M. Development of a tool to measure person-centered maternity care in developing settings: validation in a rural and urban Kenyan population. Reprod Health. 2017;14(1):118. Sethi R, Gupta S, Oseni L, Mtimuni A, Rashidi T, Kachale F. The prevalence of disrespect and abuse during facility-based maternity care in Malawi : evidence from direct observ…
Facility Environment	Facility has electricity	Afulani: PCMC Validation Paper WHO: SARA Manual	Afulani et al: Was there electricity in the facility? WHO: Does your facility have electricity from any source (e.g. electricity grid, generator, solar, or other) including for stand-alone devices (EPI cold chain)?; What is the electricity used for in the facility?; What is the facility’s main source of electricity?; Other than the main or primary source, does the facility have a secondary or bac…	Afulani et al: Self-report WHO: Observation	Afulani et al: exit interviews and community based interviews with postpartum women (0 to 9 weeks) WHO: Facility readiness survey	Afulani et al: Kenya (Migori, Nairobi, and Kiambu Counties), India (Uttar Pradesh), Ghana (East Mamprusi district)	Yes	Yes	Singh J, Shah P. Operational Manual For Community Based Performance Monitoring. 2004. World Bank.	Yes	Singh J, Shah P. Operational Manual For Community Based Performance Monitoring. 2004. World Bank.	Afulani PA, Diamond-Smith N, Golub G, Sudhinaraset M. Development of a tool to measure person-centered maternity care in developing settings: validation in a rural and urban Kenyan population. Reprod Health. 2017;14(1):118. World Health Organization (WHO). Service Availability and Readiness Assessment (SARA) An annual monitoring system for service delivery Reference Manual. 2015.
Facility Environment	Facility has water	Afulani: PCMC Validation Paper WHO: SARA Manual Josephson et al: QI in MNCH across 32 RBF programs Gergen et al: QoC in RBF in 32 programs in 28 countries	Afulani et al: Was there water in the facility? WHO: What is the most commonly used source of water for the facility at this time? OBSERVE THAT WATER IS AVAILABLE FROM THE SOURCE OR IN THE FACILITY ON THE DAY OF THE; Is water available from this source on facility premises?; Is there a room with auditory and visual privacy available for patient consultations?; Is there a toilet (latrine) on premi…	Afulani et al: Self-report WHO: Observation Josephson et al: Quality Indicator Gergen et al: Quality indicator	Afulani et al: exit interviews and community based interviews with postpartum women (0 to 9 weeks) WHO: Facility readiness survey Josephson et al: Facility assessments Gergen et al: Facility assessment	Afulani et al: Kenya (Migori, Nairobi, and Kiambu Counties), India (Uttar Pradesh), Ghana (East Mamprusi district) Josephson et al: Review of 68 checklists (at primary, secondary, and tertiary levels) used in 32 RBF programmes across 28 counties Gergen et al:: Systematic Review of RBF manuals and tools to measure quality performance in 28 LMICs for all facility levels primary, secondary, and tert…	Yes	Yes	Gergen J, Josephson E, Coe M, Ski S, Madhavan S. Quality of Care in Performance-Based Financing : How It Is Incorporated in 32 Programs Across 28 Countries. Glob Heal Sci Pract 2017; : 90–107. Josephson E, Gergen J, Coe M, Ski S, Madhavan S, Bauhoff S. How do performance-based financing programmes measure quality of care ? A descriptive analysis of 68 quality checklists from 28 low- and middle-in…	Yes	Misra V, Ramasankar P, Durga L, Murty JVR, Agarwal S, Shah P. Social Accountability Series: South Asia Sustainable Development Department. 2007.	Afulani PA, Diamond-Smith N, Golub G, Sudhinaraset M. Development of a tool to measure person-centered maternity care in developing settings: validation in a rural and urban Kenyan population. Reprod Health. 2017;14(1):118. World Health Organization (WHO). Service Availability and Readiness Assessment (SARA) An annual monitoring system for service delivery Reference Manual. 2015.
Facility Environment	Facility has communication equipment (phone or SW radio)	WHO: SARA Manual	• Does this facility have a functioning land line telephone that is available to call outside at all times client services are offered? CLARIFY THAT IF FACILITY OFFERS 24-HOUR EMERGENCY SERVICES, THEN THIS REFERS TO 24-HOUR AVAILABILITY. ; Does this facility have a functioning cellular telephone or a private cellular phone that is supported by the facility?; Does this facility have a functioning …	WHO: Observed	WHO: Facility readiness survey							World Health Organization (WHO). Service Availability and Readiness Assessment (SARA) An annual monitoring system for service delivery Reference Manual. 2015.
Facility Environment	Facility is safe	Afulani: PCMC Validation Paper	In general, did you feel safe in the health facility?	Self-report	Afulani et al: exit interviews and community based interviews with postpartum women (0 to 9 weeks)	Afulani et al: Kenya (Migori, Nairobi, and Kiambu Counties), India (Uttar Pradesh), Ghana (East Mamprusi district)	Yes					Afulani PA, Diamond-Smith N, Golub G, Sudhinaraset M. Development of a tool to measure person-centered maternity care in developing settings: validation in a rural and urban Kenyan population. Reprod Health. 2017;14(1):118.
Payment/equity/cost	Affordable health care services for all	Abuya et al: Population Council, Kenya	Abuya et al: Payment for health care services, as well as services related to the underlying determinants of health, has to be based on the principle of equity, ensuring that these services, whether privately or publicly provided, are affordable for all, including socially disadvantaged groups	Abuya et al: Self-report	Abuya et al: Facility exit interviews	Abuya et al: 13 facilities in Kisumu, Nyandarua, Uasin Gishu sub counties and 1 maternity hospital in Nairobi, Kenya. Inclusion criteria: 15-45y.o. who received maternity services from one of the facilities. N=641		Yes	de Walque D, Robyn PJ, Saidou H, Sorgho G, Steenland M. Looking into the Performance-Based Financing Black Box Evidence from an Impact Evaluation in the Health Sector in Cameroon. 2017. The World Bank.			Abuya T, Warren CE, Miller N, et al. Exploring the Prevalence of Disrespect and Abuse during Childbirth in Kenya. PLoS One 2015; 10: 1–13. Public Health Foundation of India
Facility culture	Coercion or requesting bribes or informal payments for better care	Kruk et al: STAHA Project: Columbia University/AMDD/Ifakara Abuya et al: Population Council, Kenya Silal et al: Inequalities in access and use of MHS in South Africa Afulani et al: PCMC Validation Paper Peca et al: Perceptions and use of institutional facilities for births in Guatemala Vogel et al: Validation of tools in 4 countries Vedam et al: The Mothers on Respect (MOR) index	Kruk et al: Health providers suggesting or asking for a bride or infromal payment for better care: Reponses to indicators were: "Experienced" or "Not Experienced" Abuya et al: At any point during this delivery in this facility did you feel/perceive or were you asked by anyone for money other than the official cost of service to access services or any favors. Silal et al: don't have access to the …	Self-report	Kruk et al: Facility exit & follow up questionnaire Abuya et al: Facility exit interview and other data sources Silal et al: Facility exit interviews (qual/quant) Afulani et al: exit interviews and community based interviews with postpartum women (0 to 9 weeks) Peca et al: Facility exit interviews Vogel et al: In-depth interviews and focus group discussions among women, healthcare providers and a…	Kruk et al: Tanga Region of Tanzania in Korogwe and Muheza Districts; 8 health facilities (2- district hospitals, 5- gov't. health centers, 1- gov't. dispensary) Women 15+ y.o. who delivered at facilities were able to participate; N=1179 exit interview and N=1532 for follow-up survey Abuya et al: 13 facilities in Kisumu, Nyandarua, Uasin Gishu sub counties and 1 maternity hospital in Nairobi, Ken…		Yes	de Walque D, Robyn PJ, Saidou H, Sorgho G, Steenland M. Looking into the Performance-Based Financing Black Box Evidence from an Impact Evaluation in the Health Sector in Cameroon. 2017. The World Bank.			Kruk ME, Kujawski S, Mbaruku G et al Disrespectful and abusive treatment during facility delivery in Tanzania : a facility and community survey. Health Policy Plan 2014; : 1–8. & Kujawski SA, Freedman LP, Ramsey K, Mbaruku G, Mbuyita S, et al. (2017) Community and health system intervention to reduce disrespect and abuse during childbirth in Tanga Region, Tanzania: A comparative before-and-after …
Evidence based care	Non-evidence based care	Raj et al: Mistreatment in UP India	Did the the healthcare provider forcefully push on your abdomen during delivery?; Did the health care provider apply force to pull the baby (during delivery)?;	Self-report	Raj et al: Post partum interview/sruvey post-discharge	Raj et al: All districts in Uttar Pradesh; married women N=2639	Yes					Raj A, Dey A, Boyce S et al Associations Between Mistreatment by a Provider during Childbirth and Maternal Health Complications in Uttar Pradesh, India. Matern Child Health J 2017; 21: 1821–33.
Evidence based care	Delivery with immediate skin to skin after birth	MCHIP Mozambique: USAID Evaluation Hill et al: URC/HCI/USAID MCHIP Toolkit: USAID/MCHIP Hennegan et al: QoC Queensland Mukamurigo et al: Rwanda Perceptions/Experiences de Souza et al: Inst. Violence and QoC assoc. with PPD	MCHIP Mozambique: "Evidence of Kangaroo care method": "Yes", "No" Hill et al: Don't have access to questionnaire MCHIP Toolkit 2012: Rank the intensity (0-4) "Contact of the newborn skin-to-skin with the mother immediately after the delivery for at least the first hour" Hennegan et al: Held baby within first 5 minutes Mukamurigo et al: I had my baby skin to skin after brith; No, baby not skin to …	Self-report	MCHIP Mozambique: Provider interviews Hill et al: Chart review using a structured quantitative questionnaire (Cannot find questionnaire) MCHIP 2012: Survey questionnaire with stakeholders Hennegan et al: state-wide population based survey Mukamurigo et al: structured interview and questionnaire with women 1-13 months postpartum de Souza et al: Interviews with postpartum women	MCHIP Mozambique: 17 health facilities in Maputo (city and province, 13 health facilities in Manica, and 18 health facilities from Nampula provinces in Mozambique Hill et. Al: Albania, Armenia, Georgia, and Russia MCHIP Toolkit 2012: 48 individuals from 19 countries (40% Africa, 33% Latin America, 27% Asia, Europe, and Oceania) Areas of work: 37% training/teaching, 27% clinical practice, 25% tech…						Velthausz D, Donco R, Maraxis BV. Maternal Child Health Integrated Program Mozambique ( 2011-2015 ) End-Term Evaluation. 2015. USAID/MCHIP. Hill K, Chitashvili T, Trevitt J, Panajyan G. Assessment of Selected Best Practices for Maternal and Newborn Care in Albania, Armenia, Georgia, and Russia. 2012. USAID. Reis V, Deller B, Carr C, Smith J. Respectful Maternity Care: Country Experiences. 2012. U…
Evidence based care	Delivery with immediate breastfeeding (during first hour)	MCHIP Mozambique: USAID Evaluation MCHIP Toolkit: USAID/MCHIP Hennegan et al: QoC Queensland Mukamurigo et al: Rwanda Perceptions/Experiences de Souza et al: Inst. Violence and QoC assoc. with PPD	MCHIP Mozambique: "Evidence of early breastfeeding (in labor/delivery room": "Yes", "No" MCHIP Toolkit 2012: Rank the intensity (0-4) "Early breastfeeding (within the first hour after birth) Hennegan et al: Baby placed to breast within an hour (Y/N) Mukamurigo et al: The health care providers helped me to start breastfeeding:Totally disagree; Mostly disagree; Mostly agree; Totally agree de Souza:…	Self-report	MCHIP Mozambique: Provider interviews MCHIP 2012: Survey questionnaire with stakeholders Hennegan et al: state-wide population based survey Mukamurigo et al: structured interview and questionnaire with women 1-13 months postpartum de Souza et al: Interviews with postpartum women	MCHIP Mozambique: 17 health facilities in Maputo (city and province, 13 health facilities in Manica, and 18 health facilities from Nampula provinces in Mozambique MCHIP Toolkit 2012: 48 individuals from 19 countries (40% Africa, 33% Latin America, 27% Asia, Europe, and Oceania) Areas of work: 37% training/teaching, 27% clinical practice, 25% technical advising/consulting, 23% program/management, …						Velthausz D, Donco R, Maraxis BV. Maternal Child Health Integrated Program Mozambique ( 2011-2015 ) End-Term Evaluation. 2015. USAID/MCHIP. Reis V, Deller B, Carr C, Smith J. Respectful Maternity Care: Country Experiences. 2012. USAID/MCHIP. Hennegan J, Kruske S, Redshaw M. Remote access and care : A comparison of Queensland women ’ s maternity care experience according to area of residence. Wome…
Evidence based care	Rooming-in of mother and newborn	Hill et al: URC/HCI/USAID Sethi et al: D&A in Malawi de Souza et al: Inst. Violence and QoC assoc. with PPD	Hill et al: No separation of mother and baby Sethi et al: Mother and newborn were not kept in same room after delivery (rooming-in) de Souza et al: Rooming-in (Y/N)	Self-report Sethi et al: Observation	Hill et al: Chart review using a structured quantitative questionnaire (Cannot find questionnaire) Sethi et al: Labor and delivery observations de Souza et al: Interviews with postpartum women	Hill et. Al: Albania, Armenia, Georgia, and Russia Sethi et al: N=2019 oberservations at 40 facilities (12 health centers and 28 hospitals) in Malawi						Hill K, Chitashvili T, Trevitt J, Panajyan G. Assessment of Selected Best Practices for Maternal and Newborn Care in Albania, Armenia, Georgia, and Russia. 2012. USAID. Sethi R, Gupta S, Oseni L, Mtimuni A, Rashidi T, Kachale F. The prevalence of disrespect and abuse during facility-based maternity care in Malawi : evidence from direct observations of labor and delivery. Reprod Health 2017; : 1–1…
Information Exchange	Information is given in an open and friendly manner	Client exit interview										Population Council, Kenya
Evidence based care	Unnecessary separation of mother and newborn after the birth	MCHIP Asefa et al: D&A in Ethiopia	MCHIP Question Asefa et al: "I was separated from my baby without medical indication."	Self-report	MCHIP 2012: Survey questionnaire with stakeholders Asefa et al: Facility exit questionnaire	MCHIP 2012: 48 individuals from 19 countries (40% Africa, 33% Latin America, 27% Asia, Europe, and Oceania) Areas of work: 37% training/teaching, 27% clinical practice, 25% technical advising/consulting, 23% program/management, and 19% research: IEC/promotion and advocacy Asefa et al: N=191 Four public health facilities in Addis Ababa de Souza et al : Postpartum women who gave birth three or less…						MCHIP. Quality of Antenatal and Delivery Care Services in Six Countries in Sub-Saharan Africa. 2012. Asefa A, Bekele D. Status of respectful and non-abusive care during facility-based childbirth in a hospital and health centers in Addis Ababa , Ethiopia. Reprod Health 2015; 12: 1–9. de Souza KJ, Rattner D, Gubert MB. Institutional violence and quality of service in obstetrics are associated with …
General	Humiliated, disrespected, or felt bad	Abuya et al: Population Council, Kenya Peca et al: Perceptions and use of institutional facilities for births in Guatemala	Abuya et. al: On a scale of 1-5 were you treated in a way that made you feel humiliated or disrespected? - non-dignified care Peca et al: At any time during your stay at facility "X" did they do something to you that mad you feel bad? (yex/no) Followed by; What did they do? (open response);	Self-report	Abuya et al: Facility exit interview Peca et al: Facility exit interviews	Abuya et al: 13 facilities in Kisumu, Nyandarua, Uasin Gishu sub counties and 1 maternity hospital in Nairobi, Kenya. Inclusion criteria: 15-45y.o. who receieved maternity services from one of the facilities. N=641 Peca et al: Guatemala facility and home births in the Western Highlands				Yes	Gullo S, Galavotti C, Kuhlmann AS, Msiska T, Hastings P, Marti CN. Effects of a social accountability approach , CARE ’ s Community Score Card , on reproductive health-related outcomes in Malawi : A cluster-randomized controlled evaluation. PLoS One 2017; 12: 1–20.	Abuya T, Warren CE, Miller N, et al. Exploring the Prevalence of Disrespect and Abuse during Childbirth in Kenya. PLoS One 2015; 10: 1–13. Peca, Emily; Sandberg, John. "Modeling the relationship between women's perceptions and future intention to use institutional maternity care in the Western Highlands of Guatemala." 2017, forthcoming.
General	Satisfied with services	WHO Standards Silal et al: Inequalities in access and use of MHS in South Africa Abuya et al: Population Council, Kenya Afulani et al: PCMC Validation Paper Plus others Kruk et al: STAHA Project: Columbia University/AMDD/Ifakara Hennegan et al: QoC Queensland Leal et al: Racial Inequities in Care Brazil	Silal et al: don't have access to the quant exit interview guide or qual interview guide Abuya et al: "Satisfied with current delivery services?" "Yes/no" Afulani et al: Level of Satisfaction: "Dissatisfied", "Neither satisfied or dissatisfied", "Satisfied", "Very Satisfied" Kruk et al: Very satisfied with delivery: "Yes" "No" Hennegan et al: Satisfied with duration of hospital stay (Y/N) Leal et…	Self-report	WHO Standards Silal et al: Facility exit interviews (qual/quant) Abuya et al: Facility exit interview and other data sources Afulani et al: exit interviews and community based interviews with postpartum women (0 to 9 weeks) Kruk et al: Facility exit & follow up questionnaire Hennegan et al: state-wide population based survey Leal et al: National hospital-based study suing medical records and inte…	WHO Standards Silal et al: Two urban and two rural health districts in South Africa; N=1,231 quantitative exit interviews and N=16 qualitative interviews Abuya et al: 13 facilities in Kisumu, Nyandarua, Uasin Gishu sub counties and 1 maternity hospital in Nairobi, Kenya. Inclusion criteria: 15-45y.o. who receieved maternity services from one of the facilities. N=641 Afulani et al: Kenya (Migori, …		Yes	Brenner S, Muula AS, Robyn PJ, Bärnighausen T, Sarker M, Mathanga DP. Design of an impact evaluation using a mixed methods model – an explanatory assessment of the effects of results-based financing mechanisms on maternal healthcare services in Malawi. BMC Health Serv Res 2014; 14: 1–17.	Yes	Misra V, Ramasankar P, Durga L, Murty JVR, Agarwal S, Shah P. Social Accountability Series: South Asia Sustainable Development Department. 2007.	WHO: World Health Organization (WHO). Standards for improving quality of maternal and newborn care in health facilities. 2016. Silal SP, Penn-kekana L, Harris B et alExploring inequalities in access to and use of maternal health services in South Africa. BMC Health Serv Res 2012; 12. http://www.biomedcentral.com/1472-6963/12/120Page. Abuya T, Warren CE, Miller N, et al. Exploring the Prevalence o…
General	Perceived quality	Afulani et al: PCMC Validation Paper Abuya et al: Population Council, Kenya Plus others Peca et al: Perceptions and use of institutional facilities for births in Guatemala Kambala et. al: Perceptions of quality across the maternal care continuum Kruk et al: STAHA Project: Columbia University/AMDD/Ifakara	Afulani et al: Rating of quality of care: "Poor", "Fair", "Good", "Very Good", "Excellent Abuya et al: Perceived quality of care received ; excellent, good fair Peca et al: How did you feel about the care you received during your last birth? (likert) Kambala et. al: likert scale Kruk et al: Overall quality of care for delivery: "Excellent or very good"; "Good"; or "Fair or poor"	Self-report	Afulani et al: exit interviews and community based interviews with postpartum women (0 to 9 weeks) Peca et al: Facility exit interviews Kruk et al: Facility exit & follow up questionnaire	Afulani et al: Kenya (Migori, Nairobi, and Kiambu Counties), India (Uttar Pradesh), Ghana (East Mamprusi district) Peca et al: Guatemala facility and home births in the Western Highlands Kambala et. al: Perceptions of quality across the maternal care continuum in the context of a health financing intervention: Evidence from a mixed methods study in rural Malawi, Malawi Kruk et al: Tanga Region of…				Yes	Misra V, Ramasankar P, Durga L, Murty JVR, Agarwal S, Shah P. Social Accountability Series: South Asia Sustainable Development Department. 2007. Gullo S, Galavotti C, Kuhlmann AS, Msiska T, Hastings P, Marti CN. Effects of a social accountability approach , CARE ’ s Community Score Card , on reproductive health-related outcomes in Malawi : A cluster-randomized controlled evaluation. PLoS One 2017…	Afulani PA, Diamond-Smith N, Golub G, Sudhinaraset M. Development of a tool to measure person-centered maternity care in developing settings: validation in a rural and urban Kenyan population. Reprod Health. 2017;14(1):118. Peca, Emily; Sandberg, John. "Modeling the relationship between women's perceptions and future intention to use institutional maternity care in the Western Highlands of Guatem…
