# Supplementary material for: A Rapid Review of Available Evidence to Inform Indicators for Routine Monitoring and Evaluation of Respectful Maternity Care
Source: Glob Health Sci Pract. 2020 Mar 30;8(1):125–35. doi: 10.9745/GHSP-D-19-00323 (PMC7108935; doi:10.9745/GHSP-D-19-00323)
Supplement: 19-00323-Afulani-Supplement2.xlsx [file 19-00323-Afulani-Supplement2.xlsx]

## Sheet: Appendix2-Ranked survey res (2)
Supplement to: Afulani P, Buback L, McNally B, Mbuyita S, Mwanyika-Sando M, Peca E. Glob Health Sci Pract. 2020;8(1). https://doi.org/10.9745/GHSP-D-19-00323
Supplement 2. Indicators Selected for Quality Improvement, Community Score Cards, and Performance-Based Financing
Quality Improvement				Community Score Cards				Performance-Based Financing
	No.	%			No.	%			No.	%
Providers do not perform non-evidence based care	36	97.3		Treats woman with respect	36	97.3		Woman not detained at facilities due to lack of payment	23	62.2
No unnecessary separation of mother and newborn after birth	36	97.3		No verbal abuse	34	91.9		Woman gives informed consent prior to procedures and examinations	23	62.2
Rooming-in of mother and newborn	34	91.9		No sexual abuse	34	91.9		No episiotomy given or sutured without anesthesia	22	59.5
Delivery with immediate breastfeeding	34	91.9		No physical abuse	34	91.9		Delivery with immediate skin to skin after birth	22	59.5
Cleanliness of facility	34	91.9		No discrimination or poor treatment based on ethnicity, race, economic status,	34	91.9		Delivery with immediate breastfeeding	22	59.5
Patient records and medical files are kept confidential with limited access	33	89.2		Woman does not feel humiliated	33	89.2		Providers do not perform non-evidence based care	21	56.8
No verbal abuse	33	89.2		Not requesting bribes or informal payments	33	89.2		Health care services affordable for all	21	56.8
Facility has water	33	89.2		Not abandoning woman during labor and delivery	33	89.2		Cleanliness of facility	21	56.8
Facility has electricity	33	89.2		Allows woman to have choice of companion during labor and delivery	33	89.2		Availability of adequate number of qualified medical staff	21	56.8
Facility has communication equipment	33	89.2		Perception of quality of care	32	86.5		Woman given information about care	19	51.4
Allows woman to assume birth position of choice	33	89.2		Culturally appropriate care	32	86.5		Not requesting bribes or informal payments	19	51.4
Woman encouraged to and able to ask questions	32	86.5		Woman completely trusts staff	31	83.8		Facility has water	19	51.4
Providers explain to woman what to expect and any medications administered or pr	32	86.5		Perception of wait time	31	83.8		Patient records and medical files are kept confidential with limited access	18	48.6
Physical privacy	32	86.5		Woman not detained at facilities due to lack of payment	30	81.1		No verbal abuse	18	48.6
No physical abuse	32	86.5		Treats woman politely	30	81.1		No physical abuse	18	48.6
Delivery with immediate skin to skin after birth	32	86.5		Satisfaction with services	30	81.1		No discrimination or poor treatment based on ethnicity, race, economic status,	18	48.6
Availability of adequate number of qualified medical staff	32	86.5		Not denying woman care	30	81.1		Facility not overcrowded	18	48.6
Auditory privacy	32	86.5		Cleanliness of facility	30	81.1		Facility has electricity	18	48.6
Allows woman to have choice of companion during labor and delivery	32	86.5		Allows woman to assume birth position of choice	30	81.1		Satisfaction with services	17	45.9
Woman gives informed consent prior to procedures and examinations	31	83.8		Woman encouraged to and able to ask questions	29	78.4		Rooming-in of mother and newborn	17	45.9
Allows woman to move around during labor	31	83.8		Woman called by name	29	78.4		Physical privacy	17	45.9
Woman given information about care	30	81.1		Treats woman in a friendly manner	29	78.4		Facility has communication equipment	17	45.9
Not denying woman care	30	81.1		Greets woman	29	78.4		Allows woman to assume birth position of choice	17	45.9
No episiotomy given or sutured without anesthesia	30	81.1		Facility is percieved safe	29	78.4		Not denying woman care	16	43.2
Providers speaks to woman in a language and at a language-level that she underst	29	78.4		Woman gives informed consent prior to procedures and examinations	28	75.7		Allows woman to have choice of companion during labor and delivery	16	43.2
Not abandoning woman during labor and delivery	29	78.4		Woman given information about care	28	75.7		Treats woman with respect	15	40.5
Involves woman in care	29	78.4		Providers speaks to woman in a language and at a language-level that she underst	28	75.7		No sexual abuse	15	40.5
Facility not overcrowded	29	78.4		Involves woman in care	28	75.7		No unnecessary separation of mother and newborn after birth	14	37.8
Woman not detained at facilities due to lack of payment	28	75.7		Introduction of self	28	75.7		Culturally appropriate care	14	37.8
Providers ask about emotional feelings and concerns	28	75.7		Health care services affordable for all	28	75.7		Auditory privacy	14	37.8
No sexual abuse	28	75.7		Allows woman to move around during labor	28	75.7		Allows woman to move around during labor	14	37.8
Facility is percieved safe	28	75.7		Allows food and drink during labor	28	75.7		Woman does not feel humiliated	13	35.1
Allows food and drink during labor	28	75.7		Responds to womans call for help	27	73		Responds to womans call for help	13	35.1
Woman does not feel humiliated	27	73		Providers explain to woman what to expect and any medications administered or pr	27	73		Providers speaks to woman in a language and at a language-level that she underst	13	35.1
Responds to womans call for help	27	73		Physical privacy	27	73		Providers explain to woman what to expect and any medications administered or pr	13	35.1
No discrimination or poor treatment based on ethnicity, race, economic status,	27	73		Facility not overcrowded	26	70.3		Perception of quality of care	13	35.1
Culturally appropriate care	27	73		Providers ask about emotional feelings and concerns	25	67.6		Facility is percieved safe	13	35.1
Attempts to control pain	27	73		No unnecessary separation of mother and newborn after birth	25	67.6		Attempts to control pain	13	35.1
Treats woman with respect	26	70.3		Auditory privacy	25	67.6		Woman encouraged to and able to ask questions	12	32.4
Introduction of self	26	70.3		Providers show interest in womans well-being	24	64.9		Not abandoning woman during labor and delivery	12	32.4
Not requesting bribes or informal payments	24	64.9		Attempts to control pain	24	64.9		Introduction of self	12	32.4
Woman called by name	23	62.2		Rooming-in of mother and newborn	23	62.2		Allows food and drink during labor	12	32.4
Providers show interest in womans well-being	23	62.2		No episiotomy given or sutured without anesthesia	23	62.2		Involves woman in care	10	27
Greets woman	23	62.2		Facility has water	23	62.2		Treats woman politely	9	24.3
Perception of quality of care	22	59.5		Delivery with immediate skin to skin after birth	23	62.2		Providers show interest in womans well-being	9	24.3
Health care services affordable for all	22	59.5		Delivery with immediate breastfeeding	22	59.5		Providers ask about emotional feelings and concerns	9	24.3
Treats woman politely	21	56.8		Availability of adequate number of qualified medical staff	22	59.5		Perception of wait time	9	24.3
Satisfaction with services	21	56.8		Facility has electricity	21	56.8		Greets woman	8	21.6
Perception of wait time	19	51.4		Providers do not perform non-evidence based care	18	48.6		Treats woman in a friendly manner	7	18.9
Woman completely trusts staff	16	43.2		Facility has communication equipment	18	48.6		Woman called by name	6	16.2
Treats woman in a friendly manner	7	18.9		Patient records and medical files are kept confidential with limited access	12	32.4		Woman completely trusts staff	3	8.1
